# Supplementary material
Source: PubMed Central journal article supplement (PMC4618684)
Supplement: NIHMS664649-supplement-2.pdf [file NIHMS664649-supplement-2.pdf]

## SUPPLEMENTAL DATA

**Table S1. Related to Figure 1.** Pre-BCR and BCL6 expression and function of patient-derived ALL samples and cell lines studied

| Case           | Lesion                      | pre-BCR expression | pre-BCR function                | BCL6 expression | STAT5-activity          |
|----------------|-----------------------------|--------------------|---------------------------------|-----------------|-------------------------|
| ICN12          | <i>TCF3-PBX1</i>            | μHC, λ5, VpreB     | Src, Syk, Btk, Ca <sup>2+</sup> | BCL6            | negative                |
| JFK3           | <i>PBX1</i> , del6q21       | μHC, λ5, VpreB     | n.d.                            | BCL6            | negative                |
| JFK4           | <i>TCF3-PBX1</i>            | μHC, λ5            | n.d.                            | BCL6            | negative                |
| JFK5           | <i>TCF3-PBX1</i>            | μHC, λ5            | n.d.                            | BCL6            | negative                |
| JFK6           | <i>TCF3-PBX1</i>            | μHC, λ5            | n.d.                            | BCL6            | negative                |
| JFK7           | <i>TCF3-PBX1</i>            | μHC, λ5            | n.d.                            | BCL6            | negative                |
| PDX60 (11064)  | <i>TCF3-PBX1</i>            | μHC, λ5, VpreB     | Src, Syk, Btk                   | BCL6            | negative                |
| PDX61 (7112)   | <i>TCF3-PBX1</i>            | μHC, λ5, VpreB     | Src, Syk, Btk                   | BCL6            | negative                |
| SFO7           | <i>TCF3-PBX1</i>            | μHC, λ5, VpreB     | n.d.                            | BCL6            | negative                |
| SFO8           | <i>TCF3-PBX1</i>            | μHC, λ5, VpreB     | n.d.                            | BCL6            | negative                |
| PDX62 (09-565) | Hypodiploid                 | μHC, λ5, VpreB     | n.d.                            | BCL6            | negative                |
| ICN6           | <i>ETV6-RUNX1</i>           | negative           | negative                        | negative        | STAT5-pY <sup>694</sup> |
| ICN3           | <i>MLL-AF4</i>              | negative           | negative                        | negative        | negative                |
| ICN13          | <i>MLL-AF4</i>              | negative           | negative                        | negative        | STAT5-pY <sup>694</sup> |
| ICN1           | <i>BCR-ABL1</i>             | negative           | negative                        | negative        | STAT5-pY <sup>694</sup> |
| BLQ1           | <i>BCR-ABL1</i>             | negative           | negative                        | negative        | STAT5-pY <sup>694</sup> |
| BLQ5           | <i>BCR-ABL1</i>             | negative           | negative                        | negative        | STAT5-pY <sup>694</sup> |
| LAX2           | <i>BCR-ABL1</i>             | negative           | negative                        | negative        | STAT5-pY <sup>694</sup> |
| LAX9           | <i>BCR-ABL1</i>             | negative           | negative                        | negative        | STAT5-pY <sup>694</sup> |
| BLQ6           | <i>BCR-ABL1</i>             | negative           | n.d.                            | negative        | STAT5-pY <sup>694</sup> |
| SFO2           | <i>BCR-ABL1</i>             | negative           | negative                        | negative        | STAT5-pY <sup>694</sup> |
| PDX2           | <i>BCR-ABL1</i>             | negative           | negative                        | negative        | STAT5-pY <sup>694</sup> |
| PDX14          | <i>BCR-ABL1</i>             | negative           | n.d.                            | negative        | STAT5-pY <sup>694</sup> |
| TXL2           | <i>BCR-ABL1</i>             | negative           | n.d.                            | negative        | STAT5-pY <sup>694</sup> |
| MXP2           | <i>BCR-ABL1</i>             | negative           | negative                        | negative        | STAT5-pY <sup>694</sup> |
| MXP3           | <i>BCR-ABL1</i>             | negative           | negative                        | negative        | STAT5-pY <sup>694</sup> |
| LAX7           | unknown                     | negative           | negative                        | negative        | STAT5-pY <sup>694</sup> |
| LAX7R          | <i>KRAS</i> <sup>G12C</sup> | negative           | negative                        | negative        | negative                |
| SFO3           | unknown                     | negative           | negative                        | negative        | STAT5-pY <sup>694</sup> |
| SFO5           | unknwon                     | negative           | negative                        | negative        | STAT5-pY <sup>694</sup> |
| PDX15          | <i>GNB1</i> <sup>K89I</sup> | negative           | negative                        | negative        | STAT5-pY <sup>694</sup> |

  

| Cell line | Lesion             | pre-BCR expression | pre-BCR function                | BCL6 expression | STAT5-activity          |
|-----------|--------------------|--------------------|---------------------------------|-----------------|-------------------------|
| SMS-SB    | <i>PDGFR</i>       | μHC, λ5, VpreB     | Src, Syk, Btk                   | BCL6            | negative                |
| 697       | <i>TCF3-PBX1</i>   | μHC, λ5, VpreB     | Src, Syk, Btk, Ca <sup>2+</sup> | BCL6            | negative                |
| Kasumi-2  | <i>TCF3-PBX1</i>   | μHC, λ5, VpreB     | Src, Syk, Btk, Ca <sup>2+</sup> | BCL6            | negative                |
| RCH-ACV   | <i>TCF3-PBX1</i>   | μHC, λ5, VpreB     | Src, Syk, Btk, Ca <sup>2+</sup> | BCL6            | negative                |
| MHH-CALL3 | <i>TCF3-PBX1</i>   | λ5, VpreB          | Ca <sup>2+</sup>                | BCL6            | negative                |
| Nalm6     | <i>ETV6-PDGFRB</i> | μHC, λ5, VpreB     | Src, Syk, Btk, Ca <sup>2+</sup> | BCL6            | negative                |
| HPB-NULL  | del(6)(q21)        | μHC, λ5, VpreB     | Src, Syk, Btk, Ca <sup>2+</sup> | BCL6            | negative                |
| BV173     | <i>BCR-ABL1</i>    | negative           | negative                        | negative        | STAT5-pY <sup>694</sup> |
| Nalm1     | <i>BCR-ABL1</i>    | negative           | negative                        | negative        | STAT5-pY <sup>694</sup> |
| SUP-B15   | <i>BCR-ABL1</i>    | negative           | negative                        | negative        | STAT5-pY <sup>694</sup> |
| Tom1      | <i>BCR-ABL1</i>    | negative           | negative                        | negative        | STAT5-pY <sup>694</sup> |
| BEL1      | <i>MLL-AF4</i>     | negative           | negative                        | n.d.            | STAT5-pY <sup>694</sup> |
| RS4;11    | <i>MLL-AF4</i>     | negative           | negative                        | n.d.            | STAT5-pY <sup>694</sup> |
| SEM       | <i>MLL-AF4</i>     | negative           | negative                        | n.d.            | STAT5-pY <sup>694</sup> |
| REH       | <i>ETV6-RUNX1</i>  | negative           | negative                        | negative        | STAT5-pY <sup>694</sup> |

**Note:** All primary samples are bone marrow biopsies, blast content >80%; LAX, Los Angeles, CA; BLQ, Bologna IT; TXL, Berlin, DE; SFO, San Francisco, CA; ICN, Seoul, KR; PDX, Portland, OR; MXP, Milan, IT; JFK, New York, NY; n.d. not done. BCL6 expression and STAT5-activity were measured by Western blot using antibodies against BCL6 and phospho-STAT5-pY<sup>694</sup>.

**Table S2. Related to Figure 1. Overview of patient-derived ALL samples studied**

| Case  | Cytogenetics                                        | Oncogene                      | Clinical course    | Gender/Age |
|-------|-----------------------------------------------------|-------------------------------|--------------------|------------|
| ICN12 | t(1;19)(q23;p13)                                    | <i>TCF3-PBX1</i>              | at diagnosis       | f/8        |
| JFK3  | 46,XX[13]/46,XX, der(19)t(1;19) (q23;p13)           | <i>TCF3-PBX1</i>              | at diagnosis       | m/46       |
| JFK4  | 44-45,XY,-7,der(9)t(7;9)(q11.2;p21),                | <i>TCF3-PBX1</i>              | at diagnosis       | m/35       |
| JFK5  | 46,XY,der(19)t(1;19)(q23;p13)[16]/46,XY[4]          | <i>TCF3-PBX1</i>              | at diagnosis       | m/20       |
| JFK6  | 46,XX[13]/46,XX,i(9)(q10), der(19)t(1;19) (q23;p13) | <i>TCF3-PBX1</i>              | at diagnosis       | f/60       |
| JFK7  | 46,XX,t(9;11)(p24;q14)?c[2]/47~49,idem,-2,          | <i>TCF3-PBX1</i>              | at diagnosis       | f/55       |
| PDX60 | 46,XY,der(19)t(1;19)(q23;p13.3) del(6)(q21)         | <i>TCF3-PBX1</i>              |                    | m          |
| PDX61 | 44-45,XY,-7,der(9)t(7;9)(q11.2;p21),add(19)         | <i>TCF3-PBX1</i>              |                    | m          |
| SFO7  | 46,XX,del(13)(q12q14),der(19)t(1;19)(q23;p13)       | <i>TCF3-PBX1</i>              | at diagnosis       | f/9        |
| SFO8  | 47,XY,+8,t(14;19)(q32;q13.1),der(19)t(1;19)         | <i>TCF3-PBX1</i>              | at diagnosis       | m/27       |
| PDX62 | <44 Chromosomes                                     |                               | at diagnosis       |            |
| ICN6  | t(12;21)(p13;q22)                                   | <i>ETV6-RUNX1</i>             | at diagnosis       | m/3        |
| ICN3  | t(4;11)(q21;q23)                                    | <i>MLL-AF4</i>                |                    | m/5        |
| ICN13 | t(4;11)(q21;q23)                                    | <i>MLL-AF4</i>                |                    | f/15       |
| ICN1  | t(9;22)(q34;q11)                                    | <i>BCR-ABL1</i> ; p210,       | at diagnosis       |            |
| BLQ1  | FISH der(9), der(22)                                | <i>BCR-ABL1</i> ; p210, T315I | Relapse (Imatinib) |            |
| BLQ5  | FISH der(9), der(22)                                | <i>BCR-ABL1</i> ; p190, T315I | Relapse (Imatinib) | f          |
| LAX2  | t(9;22)(q34;q11)                                    | <i>BCR-ABL1</i> ; p210, T315I | Relapse (Imatinib) | m/38       |
| LAX9  | t(9;22)(q34;q11), del(12)(p12;p13); del(11)(q23)    | <i>BCR-ABL1</i> ; p190,       | at diagnosis       | m          |
| BLQ6  | t(9;22)(q34;q11)                                    | <i>BCR-ABL1</i> ; p210, T315I | Relapse (Imatinib) | m          |
| SFO2  | t(9;22)(q34;q11)                                    | <i>BCR-ABL1</i> ; p210,       | at diagnosis       | m/7        |
| PDX2  |                                                     | <i>BCR-ABL1</i>               | at diagnosis       | f/52       |
| PDX14 | 45~46,XY,del(9)(p?21), t(9;22)(q34;q11.2)           | <i>BCR-ABL1</i>               | at diagnosis       | m/36       |
| TXL2  | t(9;22)(q34;q11)                                    | <i>BCR-ABL1</i>               | at diagnosis       | m/63       |
| MXP2  | t(9;22)(q34;q11)                                    | <i>BCR-ABL1</i> ; p190        |                    | /6         |
| MXP3  | t(9;22)(q34;q11)                                    | <i>BCR-ABL1</i> ; p190        |                    | /13        |
| LAX7  |                                                     |                               | at diagnosis       |            |
| LAX7R |                                                     | <i>KRAS</i> <sup>G12V</sup>   | Relapse            |            |
| SFO3  |                                                     |                               | Relapse            |            |
| SFO5  |                                                     |                               |                    |            |
| PDX15 |                                                     |                               | at diagnosis       | f/29       |

**Note:** All primary samples are bone marrow biopsies, blast content >80%; LAX, Los Angeles, CA; BLQ, Bologna IT; TXL, Berlin, DE; SFO, San Francisco, CA; ICN, Seoul, KR; PDX, Portland, OR; MXP, Milan, IT; JFK, New York, NY; f, female; m, male

**Table S3. Related to Figure 1. Overview of ALL cell lines studied**

| Cell line | Genetic Lesion     | Gender/Age | Source                          |
|-----------|--------------------|------------|---------------------------------|
| SMS-SB    | <i>PDGFR</i>       | f/16       | Dr. Jan A. Burger, MDACC        |
| 697       | <i>TCF3-PBX1</i>   | m/12       | DSMZ                            |
| Kasumi-2  | <i>TCF3-PBX1</i>   | m/15       | DSMZ                            |
| RCH-ACV   | <i>TCF3-PBX1</i>   | f/8        | DSMZ                            |
| MHH-CALL3 | <i>TCF3-PBX1</i>   | f/11       | DSMZ                            |
| Nalm6     | <i>ETV6-PDGFRB</i> | m/19       | DSMZ                            |
| HPB-NULL  | del(6)(q21)        | m/47       | Dr. Hassan Jumaa, Freiburg      |
| BV173     | <i>BCR-ABL1</i>    |            | DSMZ                            |
| Nalm1     | <i>BCR-ABL1</i>    | f/3        | DSMZ                            |
| SUP-B15   | <i>BCR-ABL1</i>    | m/9        | DSMZ                            |
| Tom1      | <i>BCR-ABL1</i>    | f/54       | DSMZ                            |
| BEL1      | <i>MLL-AF4</i>     | f/41       | Dr. Ruoping Tang, Paris, France |
| RS4;11    | <i>MLL-AF4</i>     | f/32       | DSMZ                            |
| SEM       | <i>MLL-AF4</i>     | f/5        | DSMZ                            |
| REH       | <i>ETV6-RUNX1</i>  | f/15       | DSMZ                            |

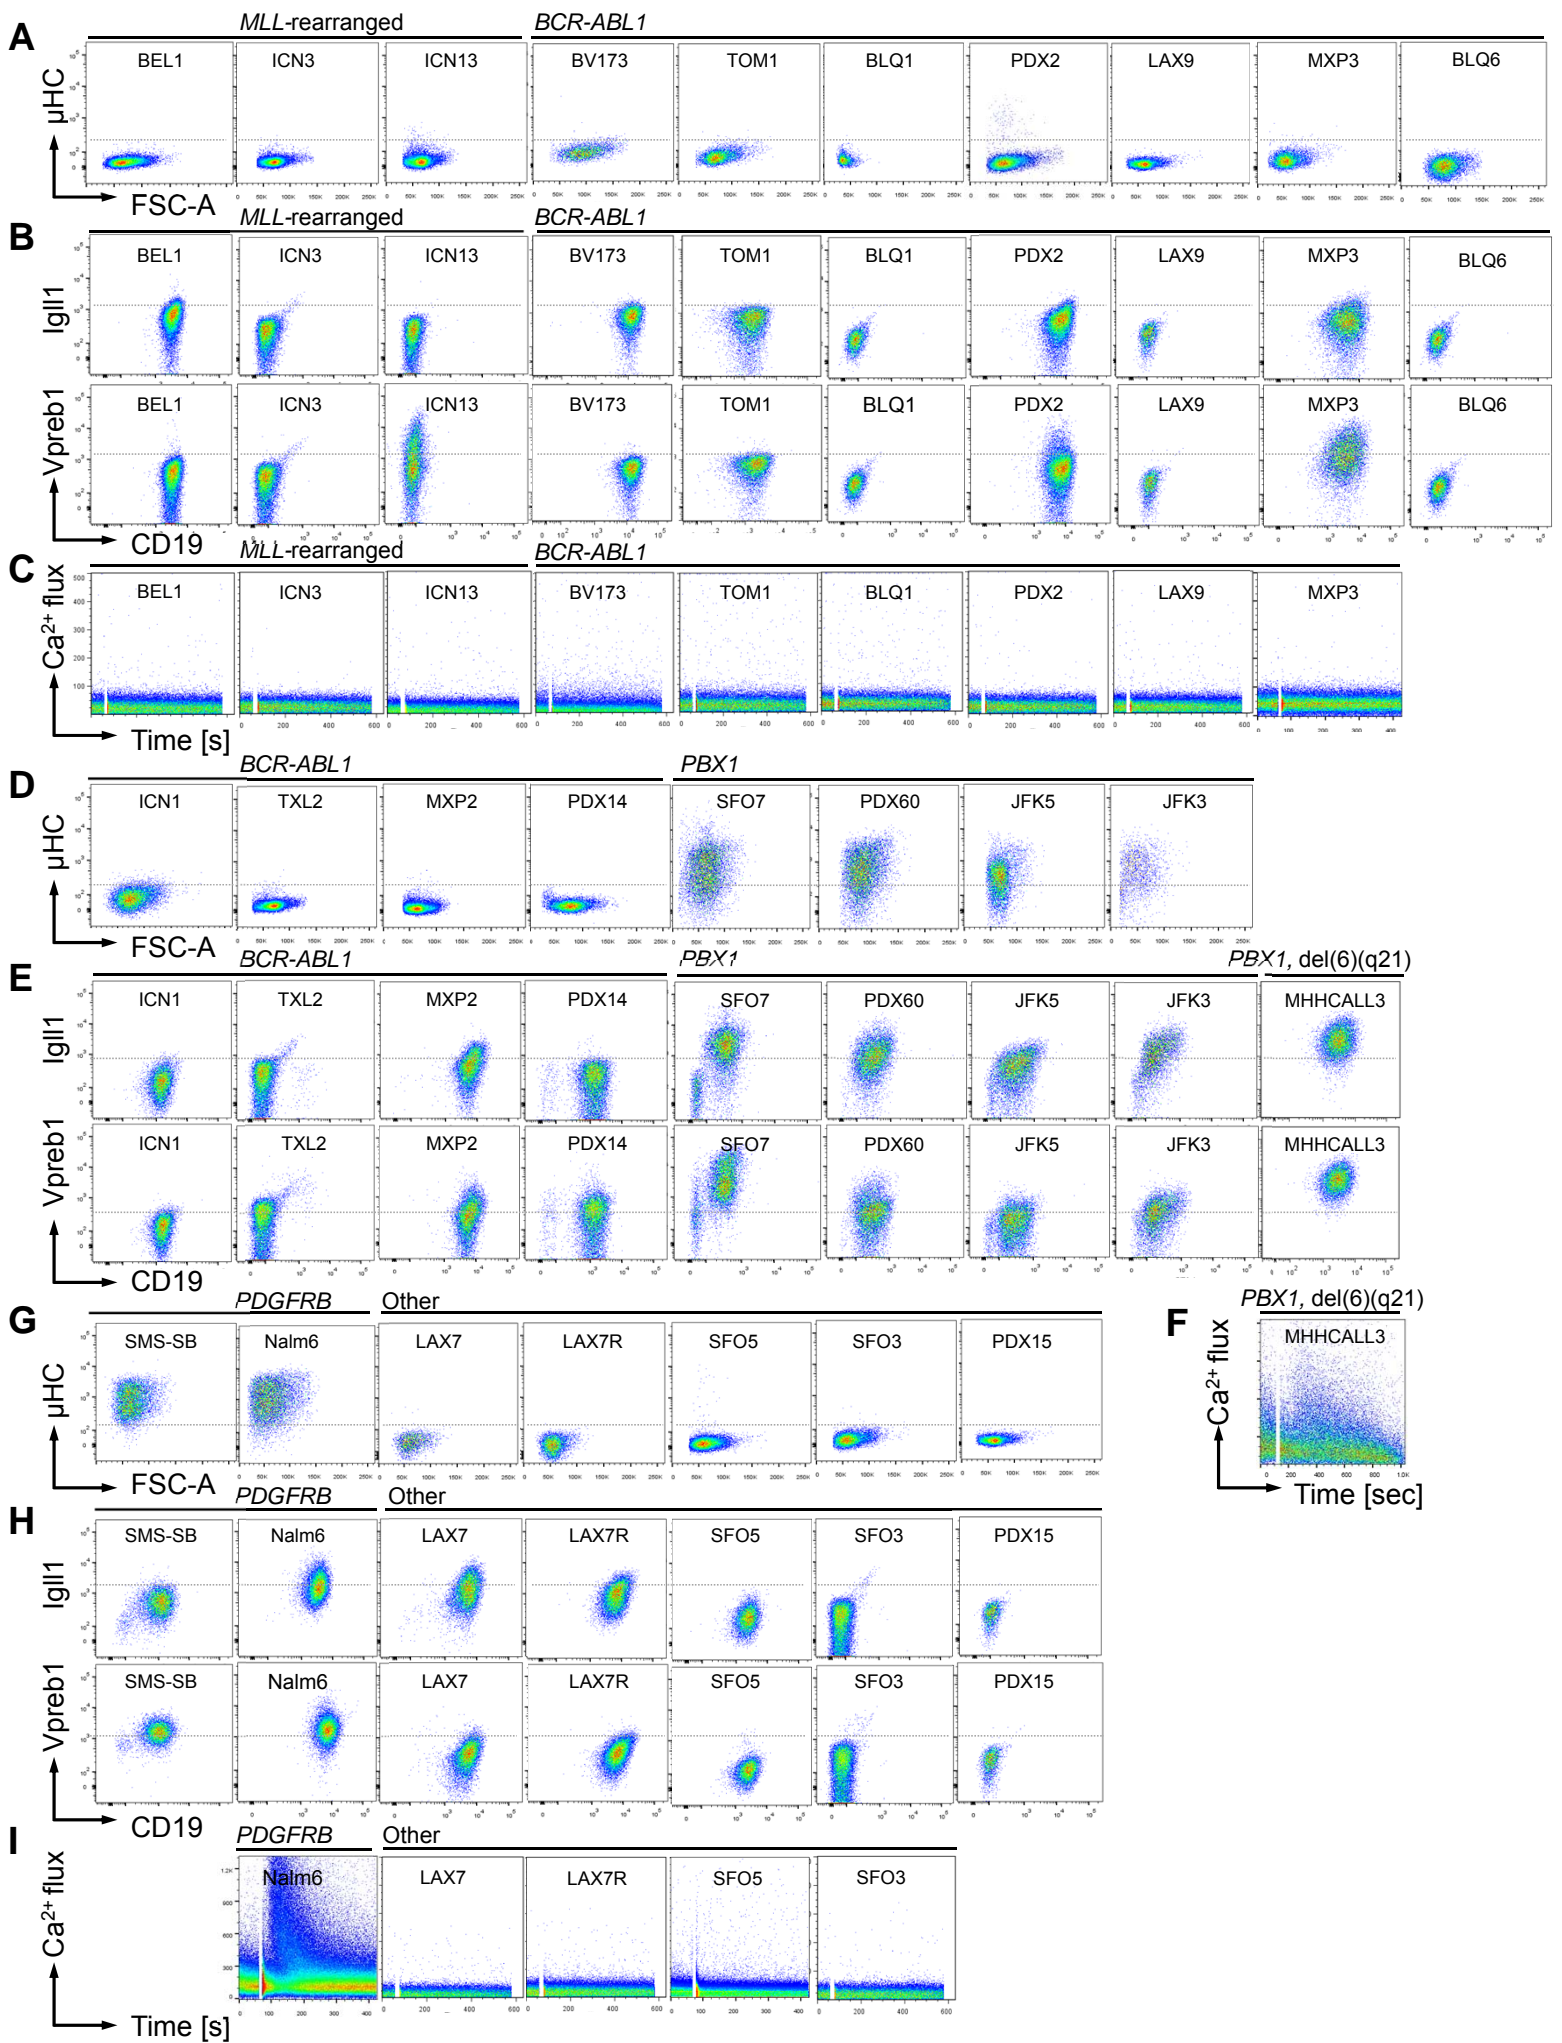

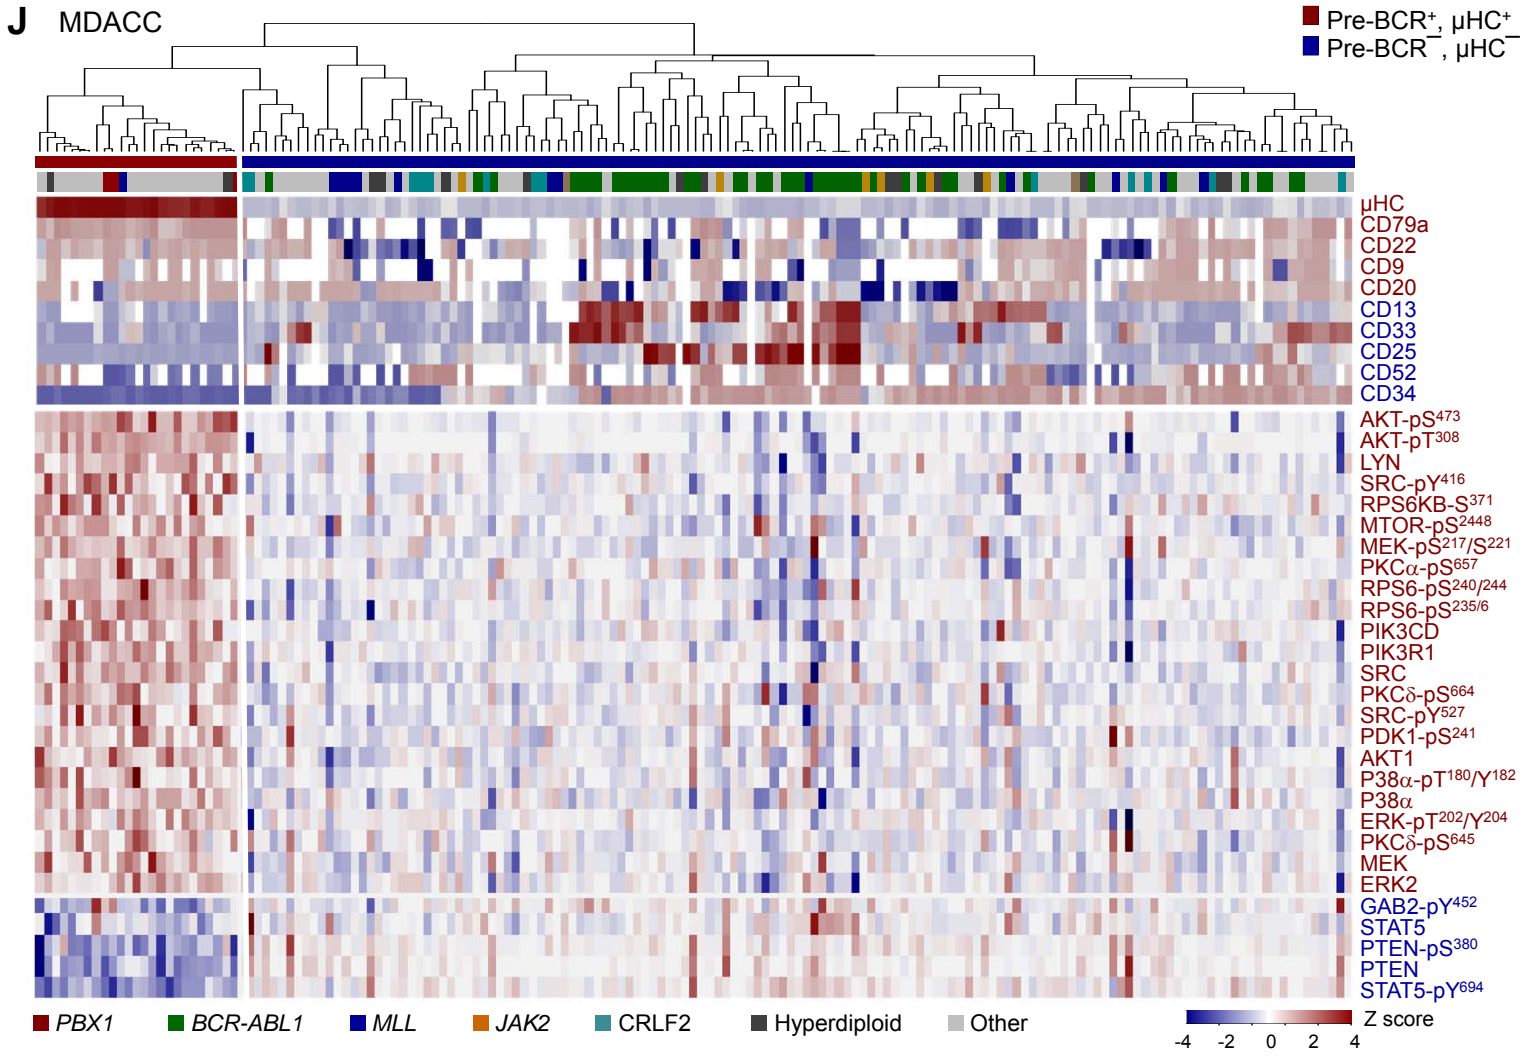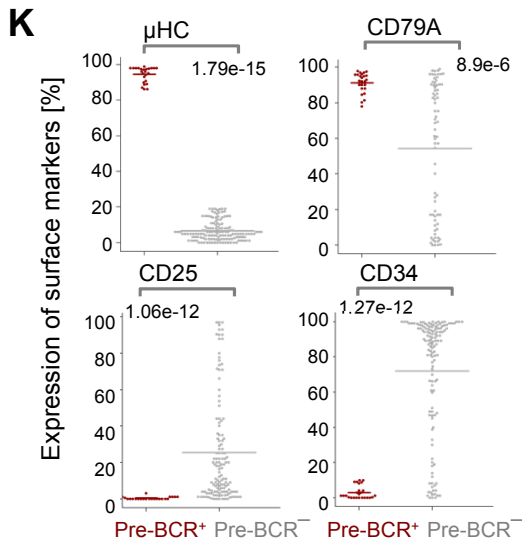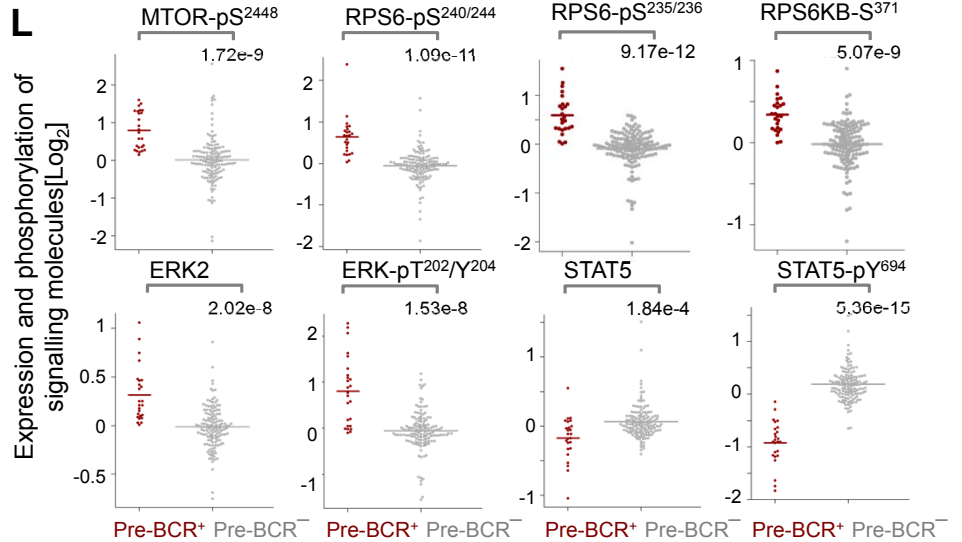

**Figure S1. Related to Figure 1. Expression and activity of the pre-B cell receptor in subsets of pre-B ALL.** (A,D,G) Flow cytometry staining for cytoplasmic  $\mu$ HC. (B,E,H) Flow cytometry staining for surface expression of the surrogate light chain components  $\lambda$ 5 (Igll1) and Vpreb1. (C,F,I) Flow cytometry staining for  $Ca^{2+}$  mobilization in response to pre-BCR engagement using  $\mu$ HC-specific antibodies, were studied in a series of pre-B ALL cell lines and patient-derived samples. (J) Expression of immunophenotypic markers were measured by flow cytometry (*top* panel) and expression and phosphorylation of 66 signaling molecules were measured by reverse phase protein arrays (RPPA, *bottom* panel) on pre-B ALL patient samples from M.D. Anderson Medical Center (MDACC 1983-2007; n=208). Patient samples were divided into pre-BCR<sup>+</sup> and pre-BCR<sup>-</sup> groups based on flow cytometry measurements of pre-BCR ( $\mu$ HC) and the Ig $\alpha$  signaling chain CD79A expression. The clustering dendrogram showed that pre-BCR<sup>+</sup> cases were clustered together based on the expression of the immunophenotypic markers. Supervised analysis on pre-BCR<sup>+</sup> vs. pre-BCR<sup>-</sup> ALL cases showed differential expression of the signalling molecules. (K) Expression on  $\mu$ HC (cytoplasmic), CD79A, CD25 and CD34 by flow cytometry, and (L) expression on p-MTOR, p-RPS6, p-RPS6KB, ERK, p-ERK, STAT5 and p-STAT5 by RPPA, were shown in pre-BCR<sup>+</sup> and pre-BCR<sup>-</sup> ALL groups. P values were calculated by two-sided Wilcoxon test.

**Table S4. Related to Figure 2. IGHM gene rearrangements in human pre-B ALL***V<sub>H</sub>-D<sub>J<sub>H</sub></sub> junctions in human normal B cell precursors (see Table S1 in Trageser et al., 2009)**V<sub>H</sub>-D<sub>J<sub>H</sub></sub> junctions in Ph<sup>+</sup> ALL (see Table S1 in Trageser et al., 2009)**V<sub>H</sub>-D<sub>J<sub>H</sub></sub> junctions in ETV6-RUNX1 ALL: 4/13 ETV6-RUNX1 ALL cases (30.8%)*

|                 |                                          |
|-----------------|------------------------------------------|
| ETV6-RUNX1 I    | CTTGMVRGV#LYYYYGMD                       |
| ETV6-RUNX1 II   | #VREGTSGAKG                              |
| ETV6-RUNX1 III  | CAHRPNIRYDAFDIW                          |
| ETV6-RUNX1 IV   | CARGKWIRHYYYMDVW                         |
| ETV6-RUNX1 V    | CAREG**WEPPMLLIYYG                       |
| ETV6-RUNX1 VI   | CARDSLRYFDWLG#DYW                        |
| ETV6-RUNX1 VII  | CARIQRYYYMDVW                            |
| ETV6-RUNX1 VIII | CQEKGPA*YYYMD<br>PSL*LLGPRNPGH           |
| ETV6-RUNX1 IX   | L*QLV*L                                  |
| ETV6-RUNX1 X    | CPVRRLLYYY*GMDV                          |
| ETV6-RUNX1 XI   | CTR*DL*VSAPSSW#DYW<br>CARIWGWGGVGGGAARRG |
| ETV6-RUNX1 XII  | CP*TYDILTGYYYYYYGMRRL                    |
| ETV6-RUNX1 XIII | CDEFGWW*LLPSLT                           |

*V<sub>H</sub>-D<sub>J<sub>H</sub></sub> junctions in Hyperdiploid ALL: 1/30 Hyperdiploid ALL cases (3.3%)*

|                    |                                               |
|--------------------|-----------------------------------------------|
| Hyperdiploid I     | CARVPSIVVVPAADGITTTTTVWT##                    |
| Hyperdiploid II    | H*DIVVVPAAIHYYYGMDV                           |
| Hyperdiploid III   | CAKDII DRWE##YFDYW                            |
| Hyperdiploid IV    | CARGGGFG#YYGMDVW                              |
| Hyperdiploid V     | CAKDLRE*YQL#YYYYYGMDVW                        |
| Hyperdiploid VI    | CAHLLPERNS*TYMVRGVIIKPPYYYYGMDV               |
| Hyperdiploid VII   | CARCRSFCIAVA#YFDYW                            |
| Hyperdiploid VIII  | CARETVGI#PFDYW                                |
| Hyperdiploid IX    | CARV*V*LRLGELSIE#SDYW                         |
| Hyperdiploid X     | CAR#FDYW                                      |
| Hyperdiploid XII   | CAHRPNSFSSSGGSC#*DYW                          |
| Hyperdiploid XIII  | CARGHQS*LG*PWADYW                             |
| Hyperdiploid XIV   | CARDRIAARP*#W<br>CARDAVLMVYAIR##NGMDVW        |
| Hyperdiploid XV    | CARDPGMVRGVRPTTTTVW                           |
| Hyperdiploid XVI   | SPSPQ#                                        |
| Hyperdiploid XVII  | GRGVL*WW*LLLGPWGQG                            |
| Hyperdiploid XVIII | PPVSGY*RSGLWLLLLRYGRLGPR                      |
| Hyperdiploid XIX   | CAR#*LLYYFDYW                                 |
| Hyperdiploid XX    | CAKDYLRFLEQ*#WLLYYYYGMDVW                     |
| Hyperdiploid XXI   | CASSTIFGVVTSYYY                               |
| Hyperdiploid XXII  | CARDRGLTESLRYFDWLLWAS#DPW                     |
| Hyperdiploid XXIII | CASDGPSGGD*LGI##DYW                           |
| Hyperdiploid XXIV  | CAKGNPWDDFWSGYYR#NWFDPW                       |
| Hyperdiploid XXV   | CARGLGATG#YYYYYYMDVW                          |
| Hyperdiploid XXVI  | CARDSAGCGSSTSCYRG#AFDIW                       |
| Hyperdiploid XXVII | CASRGYASHM#YYYYYVDFW                          |
| Hyperd. XXVIII     | YIVVVTAT*TGTSI                                |
| Hyperdiploid XXIX  | CARDGPGDGR*LGT                                |
| Hyperdiploid XXX   | CARPHYSNYV#YYYYYGMDVW<br>CARGGRTVTTSY*YYYGMDV |

**Note:** grey shades denote non-functional rearrangements; \* Stop codon; # frame shift

*V<sub>H</sub>-DJ<sub>H</sub> junctions in MLL-AF4 ALL: 0/7 MLL-AF4 cases (0%)*

|             |                                                                                        |
|-------------|----------------------------------------------------------------------------------------|
| MLL-AF4 I   | CARGFERVL**YQL#YYYYYYMDVW<br>CARDVLL***WLLPGYYYYYGM DV<br>CARDPYSSGWYYYDSSGYYQ#YYYYY G |
| MLL-AF4 II  | CARD*SRY*WCMLY##WFD PW                                                                 |
| MLL-AF4 III | CAHRWDFITMVRGVII P#YYYYGMDVW                                                           |
| MLL-AF4 IV  | CARLL*WW*LPP#YYYYGMDVW                                                                 |
| MLL-AF4 V   | LC#RTG***GVL LLLRYGTFG<br>LCESKTTVTTQVRPLGP#NWFD                                       |
| MLL-AF4 VI  | CARDLL**LLPGDY YGMDVW                                                                  |
| MLL-AF4 VII | SELT*NWFD PW                                                                           |

*V<sub>H</sub>-DJ<sub>H</sub> junctions in TCF3-PBX1 ALL: 8/8 TCF3-PBX1 ALL cases (100%)*

|                |                                               |
|----------------|-----------------------------------------------|
| TCF3-PBX1 I    | SVREAPPFVAETFQD WQGQHW                        |
| TCF3-PBX1 II   | CARGSDDYGDYVAPGGRDQDFD                        |
| TCF3-PBX1 III  | CTTLGGGGFLDQSAAWFD                            |
| TCF3-PBX1 IV   | CARIRPYCSSTSCYN EST                           |
| TCF3-PBX1 V    | CARDPRRVLWFGELT                               |
| TCF3-PBX1 VI   | CAREHPLVRF G*MLL***WLLVN<br>CARDFYWGS DYDAFDI |
| TCF3-PBX1 VII  | CAREGSIVVPAATS*Y YFDY<br>CARGHPRFLEWLLY RYFDY |
| TCF3-PBX1 VIII | CAREHPLVRY YLLDVW                             |

*V<sub>H</sub>-DJ<sub>H</sub> junctions in ALL with normal karyotype: 8/33 ALL cases with normal karyotype (24.2%)*

|                         |                                                    |
|-------------------------|----------------------------------------------------|
| Normal Karyotype I      | CARPEEAYLITMVRGVIMVPTGARTLG#                       |
| Normal Karyotype II     | CARDDGYPGMDR##                                     |
| Normal Karyotype III    | CARDLG*LGMTTGARAP                                  |
| Normal Karyotype IV     | CARIERFG#FDYW                                      |
| Normal Karyotype V      | CARPQEKQ#YYYYGMDVW                                 |
| Normal Karyotype VI     | YCSSTSCYSLNH*L                                     |
| Normal Karyotype VII    | CPVRRLLLLLRYGR                                     |
| Normal Karyotype VIII   | CARVSHSSGSP#YWYFDLW                                |
| Normal Karyotype IX     | CARCGYHSSGYYYGTAVHYW                               |
| Normal Karyotype X      | TTWTSGARA                                          |
| Normal Karyotype XII    | CARGGY#WFD PW                                      |
| Normal Karyotype XIII   | CARAPPYGYCSSTSCY GK#YYYYGMDVW<br>CAPPLRYFDW*LFRRRT |
| Normal Karyotype XIV    | CAKDPQQ#FDYW<br>CARDKVVIAAA#YYYYY GMDVW            |
| Normal Karyotype XV     | C*PGGYF#YYYYY MDVW                                 |
| Normal Karyotype XVI    | CAHSPFAGALFDY*GQG                                  |
| Normal Karyotype XVII   | CARGEGYDFWSGYYTG                                   |
| Normal Karyotype XVIII  | CVRGRSGW#YW                                        |
| Normal Karyotype XIX    | CARDLG#FDPW                                        |
| Normal Karyotype XX     | CVR*RTREEIFGSAAGS                                  |
| Normal Karyotype XXI    | CARASVTA#W                                         |
| Normal Karyotype XXII   | CARGYGGMD                                          |
| Normal Karyotype XXIII  | CARGPHLDIRCSSTSCY GSGSYLLTTGAR                     |
| Normal Karyotype XXIV   | CARAGTIKRYFDWLL*SIMITFGGVI#F                       |
| Normal Karyotype XXV    | CAKGLPLKTD F##IDYW                                 |
| Normal Karyotype XXVI   | TGAREPLVTVSSG                                      |
| Normal Karyotype XXVII  | CAKPLLL***WLLK#CFDYW                               |
| Normal Karyotype XXVIII | CARAGGGPSPYYY GMDVW                                |
| Normal Karyotype XXIX   | CARGGDCSGG##CYSGAPHYYYYYMDV                        |
| Normal Karyotype XXX    | CTTDLVVVPAAMPHL*#W                                 |
| Normal Karyotype XXXI   | CVREYDSSGCLA#DYW                                   |
| Normal Karyotype XXXII  | CARDRVIGGGFFTY YDSSGYYYVP#YY                       |
| Normal Karyotype XXXIII | CARDPKPAARPDTIF*L                                  |

**Table S5. Related to Figure 2. Overview of pre-BCR<sup>-</sup> and pre-BCR<sup>+</sup> ALL cases studied (n=830)**

| Studies    | # cases    | pre-BCR <sup>-</sup> | MLL       | Ph <sup>+</sup> | RUNX1     | Hyperdipl | Other      | PBX1     | 6q21     | 1q23     |
|------------|------------|----------------------|-----------|-----------------|-----------|-----------|------------|----------|----------|----------|
| St Jude    | 118        | 95                   | 19        | 15              | 20        | 17        | 24         | 0        | 0        | 0        |
| P9906      | 207        | 178                  | 20        | 22              | 3         | 0         | 129        | 4        | 0        | 0        |
| ECOG       | 191        | 172                  | 25        | 78              | 0         | 0         | 69         | 0        | 0        | 0        |
| MDACC      | 208        | 182                  | 14        | 58              | 0         | 16        | 94         | 0        | 0        | 0        |
| UCSF       | 68         | 59                   | 0         | 7               | 6         | 8         | 38         | 0        | 0        | 0        |
| Cell lines | 16         | 11                   | 3         | 4               | 1         | 0         | 3          | 0        | 0        | 0        |
| Xenografts | 22         | 21                   | 2         | 12              | 1         | 0         | 6          | 0        | 0        | 0        |
| <b>Sum</b> | <b>830</b> | <b>718</b>           | <b>83</b> | <b>196</b>      | <b>31</b> | <b>41</b> | <b>363</b> | <b>4</b> | <b>0</b> | <b>0</b> |
| %          |            | 86.5                 | 11.6      | 27.3            | 4.3       | 5.7       | 50.6       | 0.6      | 0        | 0        |

  

| Studies    | # cases    | pre-BCR <sup>+</sup> | MLL      | Ph <sup>+</sup> | RUNX1    | Hyperdipl | Other     | PBX1      | 6q21     | 1q23     |
|------------|------------|----------------------|----------|-----------------|----------|-----------|-----------|-----------|----------|----------|
| St Jude    | 118        | 23                   | 1        | 0               | 0        | 0         | 4         | 18        | 0        | 0        |
| P9906      | 207        | 29                   | 1        | 0               | 0        | 0         | 9         | 19        | 0        | 0        |
| ECOG       | 191        | 19                   | 0        | 0               | 0        | 0         | 13        | 6         | 0        | 0        |
| MDACC      | 208        | 26                   | 1        | 0               | 0        | 1         | 16        | 3         | 3        | 2        |
| UCSF       | 68         | 9                    | 0        | 0               | 0        | 1         | 1         | 2         | 3        | 2        |
| Cell lines | 16         | 5                    | 0        | 0               | 0        | 0         | 0         | 4         | 1        | 0        |
| Xenografts | 22         | 1                    | 0        | 0               | 0        | 0         | 0         | 1         | 0        | 0        |
| <b>Sum</b> | <b>830</b> | <b>112</b>           | <b>3</b> | <b>0</b>        | <b>0</b> | <b>2</b>  | <b>43</b> | <b>53</b> | <b>7</b> | <b>4</b> |
| %          |            | 13.5                 | 2.7      | 0               | 0        | 1.8       | 38.4      | 47.3      | 6.3      | 3.6      |

  

|                | Total      | MLL       | Ph <sup>+</sup> | RUNX1     | Hyperdipl | Other      | PBX1      | 6q21     | 1q23     |
|----------------|------------|-----------|-----------------|-----------|-----------|------------|-----------|----------|----------|
| <b># cases</b> | <b>830</b> | <b>86</b> | <b>196</b>      | <b>31</b> | <b>43</b> | <b>406</b> | <b>57</b> | <b>7</b> | <b>4</b> |

  

| Ratio | pre-BCR <sup>-</sup> | 86.5 | 96.5 | 100 | 100 | 95.3 | 89.4 | 7  | 0   | 0   |
|-------|----------------------|------|------|-----|-----|------|------|----|-----|-----|
|       | pre-BCR <sup>+</sup> | 13.5 | 3.5  | 0   | 0   | 4.7  | 10.6 | 93 | 100 | 100 |

**Note:** St. Jude, COG P9906 and ECOG E2993 patient microarray data were downloaded from GEO database with the accession numbers provided in the Supplemental Experimental Procedures.

**Table S6. Related to Figure 2. Distribution of pre-BCR<sup>-</sup> and pre-BCR<sup>+</sup> ALL cases with Age, WBC and Sex**

|     |                            | COG                  |                      |            | ECOG                 |                      |         | MDACC                |                      |            |
|-----|----------------------------|----------------------|----------------------|------------|----------------------|----------------------|---------|----------------------|----------------------|------------|
|     |                            | pre-BCR <sup>+</sup> | pre-BCR <sup>-</sup> | p value    | pre-BCR <sup>+</sup> | pre-BCR <sup>-</sup> | p value | pre-BCR <sup>+</sup> | pre-BCR <sup>-</sup> | p value    |
| Age | Mean (min-max, years)      | 10.45<br>(2.4-20.4)  | 11.25<br>(1.1-19.3)  | 0.585      | 36.8<br>(18-60)      | 40.5<br>(17-63)      | 0.247   | 40.3<br>(2.9-77)     | 41.3<br>(1.1-80)     | 0.829      |
| WBC | Mean (10 <sup>3</sup> /ml) | 116                  | 112                  | 0.868      | 83.3                 | 70.5                 | 0.611   | 42.6                 | 46.2                 | 0.901      |
| Sex | Male                       | 15                   | 122                  | 0.091<br>3 | 12                   | 97                   | 0.633   | 10                   | 105                  | 0.090<br>6 |
|     | Female                     | 14                   | 56                   |            | 7                    | 75                   |         | 16                   | 77                   |            |

WBC: white blood count; P values were calculated from Fisher's exact test for Sex and from t-test for Age and WBC.



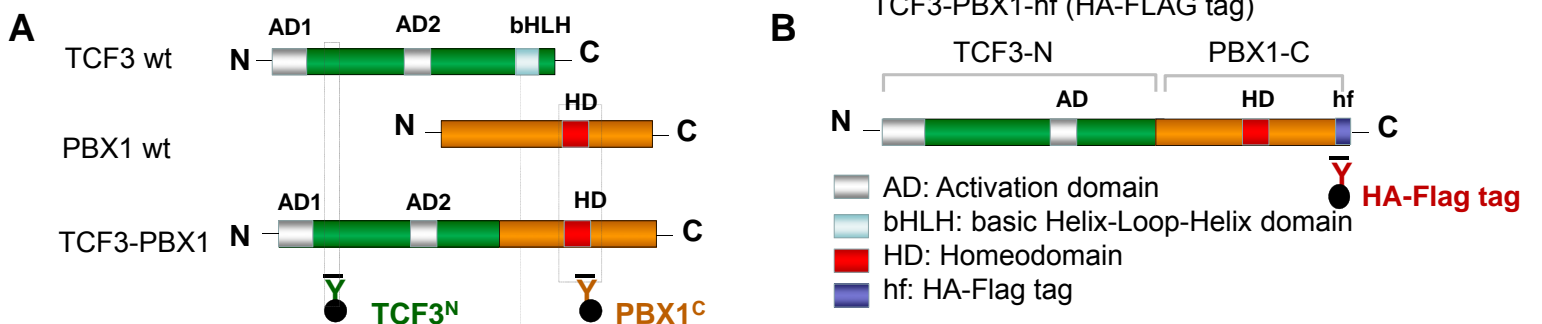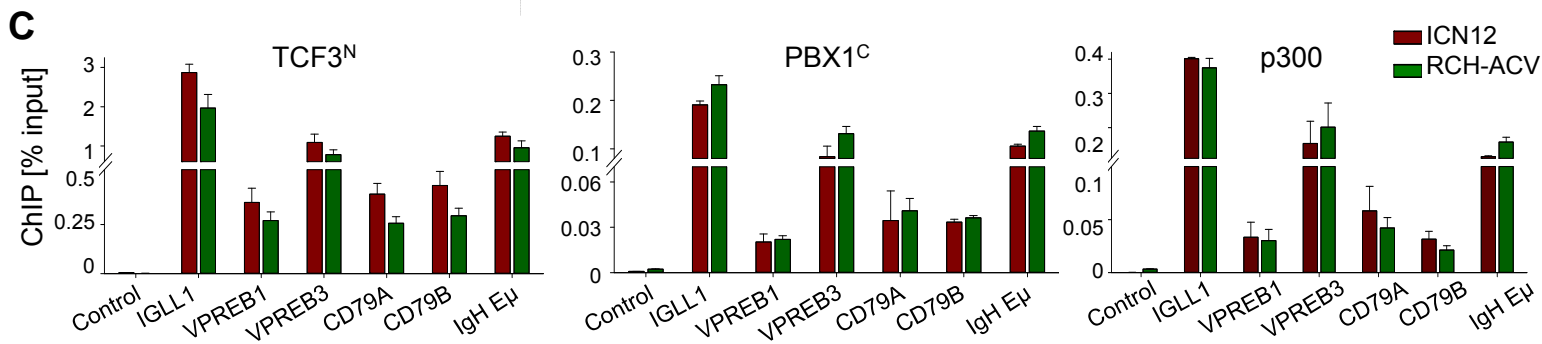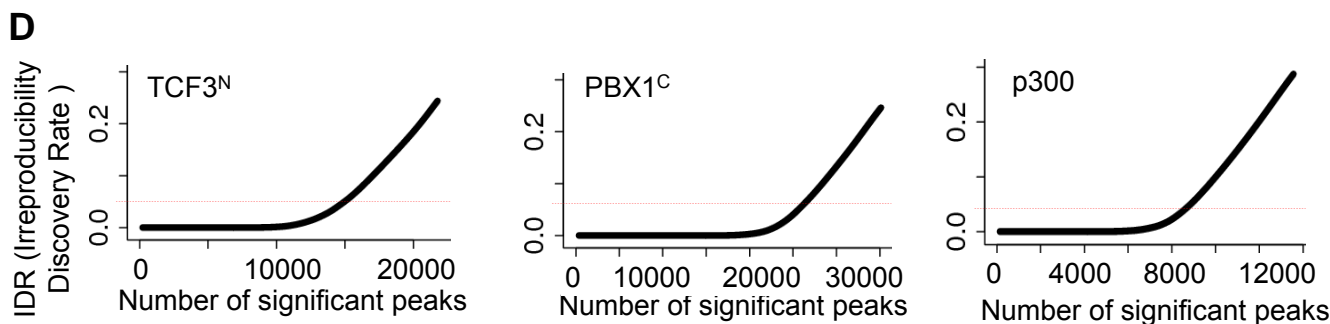

**E**

| ChIP-seq experimnt      | Total reads | Uniquely aligned reads | Number of peaks detected |                | ChIPseeqer parameters   |
|-------------------------|-------------|------------------------|--------------------------|----------------|-------------------------|
|                         |             |                        | IDR** $\leq$ 0.05        | IDR $\leq$ 0.1 |                         |
| TCF3 <sup>N</sup> ICN12 | 42,832,976  | 37,285,298             | 14,966                   | 17,034         | -t 15 -f 2 -fraglen 170 |
| PBX1 <sup>C</sup> ICN12 | 71,539,556  | 54,779,120             | 25,612                   | 28,370         | -t 15 -f 2 -fraglen 170 |
| p300 ICN12              | 54,629,598  | 46,401,734             | 8,857                    | 10,005         | -t 15 -f 2 -fraglen 170 |
| Input ICN12             | 72,568,562  | 59,893,767             |                          |                |                         |

**F**

| Targets      | Chrom | Start       | End         | IDR TCF3 <sup>N</sup> | IDR PBX1 <sup>C</sup> | IDR p300 |
|--------------|-------|-------------|-------------|-----------------------|-----------------------|----------|
| IGLL1        | chr22 | 22,251,022  | 22,256,883  | 0.002296              | 7.36E-07              | 6.32E-08 |
| VpreB1       | chr22 | 20,927,192  | 20,930,122  | 2.23E-06              | 8.52E-07              | 2.46E-07 |
| VpreB3       | chr22 | 22,424,064  | 22,426,994  | 1.42E-06              | 2.70E-06              | 2.25E-06 |
| CD79A        | chr19 | 47,070,776  | 47,074,539  | 8.83E-06              | 1.00E-06              | 3.49E-06 |
| CD79B        | chr17 | 59,357,830  | 59,365,436  | 2.90E-06              | 1.16E-06              | 2.18E-06 |
| IGHM E $\mu$ | chr14 | 105,398,977 | 105,399,760 | 6.08E-06              | 7.26E-07              | 1.14E-06 |
| BLK          | chr8  | 11,386,639  | 11,387,916  | 5.83E-06              | 2.11E-06              | 5.66E-06 |
| BANK1        | chr4  | 102,930,393 | 102,931,206 | 5.03E-06              | 8.39E-07              | 4.39E-06 |

**Figure S2. Related to Figure 3. Graphical representations of TCF3-PBX1 ChIP-seq and QChIP validation.** (A) Graphical representations of ChIP for TCF3 N-terminal (TCF3<sup>N</sup>), PBX1 C-terminal (PBX1<sup>C</sup>) and TCF3-PBX1 fusion protein. (B) Inducible expression of TCF3-PBX1-hf with an HA-Flag tag for the fusion-specific ChIP. (C) QChIP validation on pre-BCR genes using antibodies for TCF3<sup>N</sup>, PBX1<sup>C</sup> and p300 in *TCF3-PBX1* ALL cells RCH-ACV and ICN12. Y axis represents ChIP enrichment relative to input. An inactive intragenic region serves as a negative control. Data represent means  $\pm$  SEM (n=3). (D) To estimate self-consistency and determine appropriate thresholds for binding sites peak calling, Irreproducibility Discovery Rate (IDR) analysis (Li et al. 2011; Landt et al. 2012) were performed for each mapped sample. The peaks under IDR 0.05 for each sample is considered as reproducible significant peaks. (E) Summary of number of reads and peaks detected in each ChIP-seq experiment. Peaks called by CHIPseeqer program (Giannopoulou and Elemento, 2011) and peak threshold determined by IDR. (F) IDR values for the TCF3-PBX1 target genes.

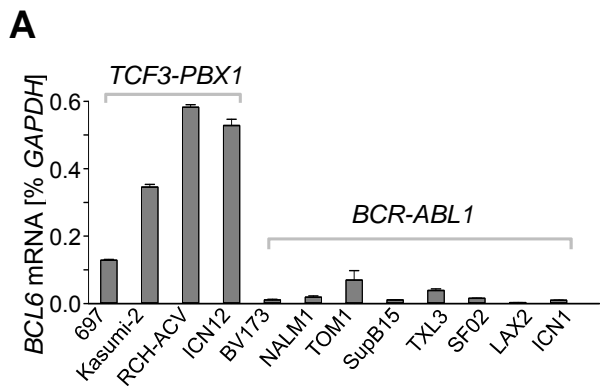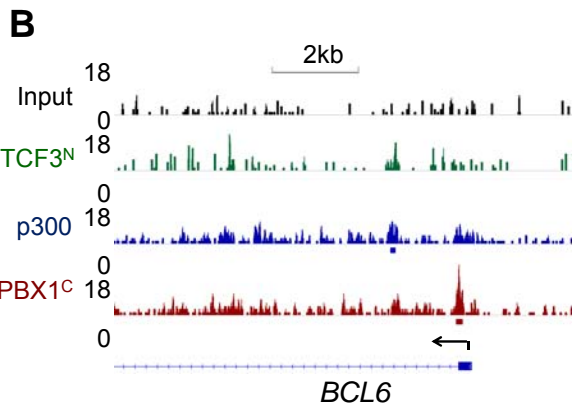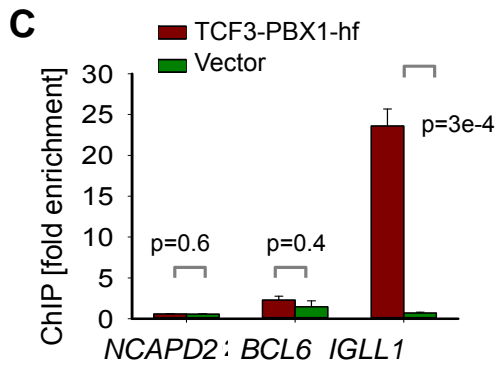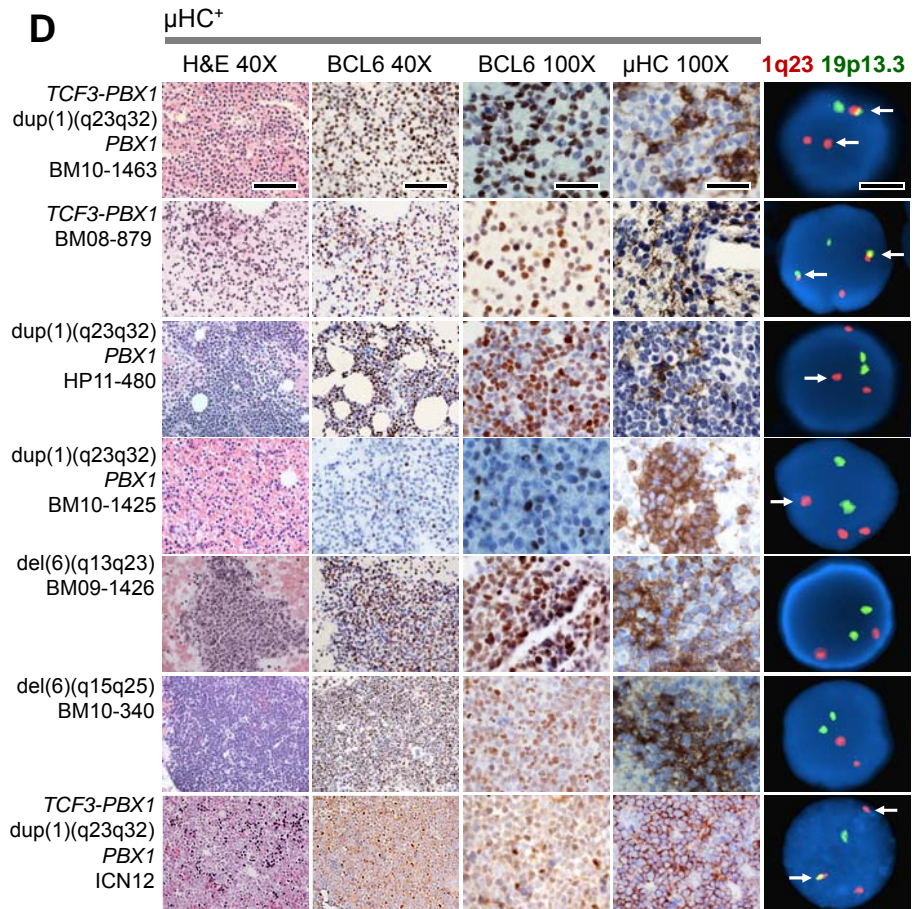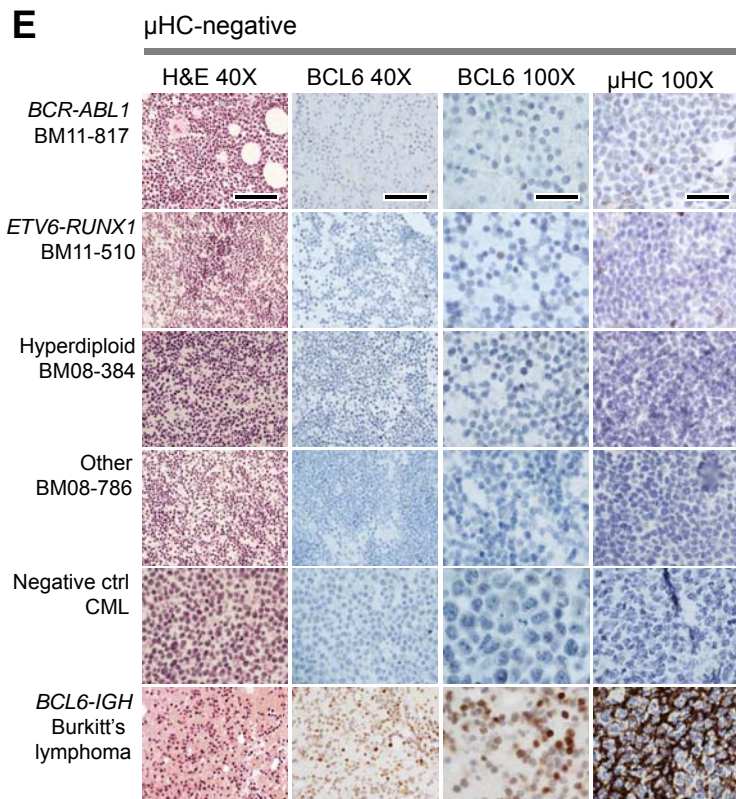

**Figure S3. Related to Figure 4. BCL6 is expressed in pre-BCR<sup>+</sup> but not pre-BCR<sup>-</sup> ALL cells. (A)** *BCL6* mRNA expression levels were measured by qRT-PCR with *GAPDH* as control on pre-B ALL samples. Data represent means  $\pm$  SEM (n=3). **(B)** ChIP-seq tracks for TCF3<sup>N</sup>, PBX1<sup>C</sup> and p300 antibodies vs. input on the *BCL6* locus in *TCF3-PBX1* ALL cells (ICN12). The gene models were shown in UCSC genome browser view hg18. **(C)** QChIP validation using the antibody against the TCF3-PBX1-hf tag vs. an empty vector control on *BCL6*, with *IGLL1* as a positive and *NCAPD2* as a negative control. Data represent means  $\pm$  SEM (n=3). P values from t-test. **(D-E)** Hematoxylin and eosin (H&E) staining and immunohistochemistry for BCL6 and cytoplasmic  $\mu$ HC were performed on paraffin-embedded bone marrow samples from pre-B ALL patients (UCSF, n=72). A Burkett lymphoma and a CML sample were used as a positive and negative control. FISH images validated *TCF3-PBX1* gene rearrangement or gain of 1q23 encompassing the *PBX1* locus in respective ALL patient samples. Scale bars, 125  $\mu$ m (H&E), 125  $\mu$ m, 50  $\mu$ m and 50  $\mu$ m (immunohistochemistry, from left to right panels) or 5  $\mu$ m (FISH).

**Table S7. Related to Figure 4.** Pre-B ALL patient samples (UCSF, n=72) studied by immunohistochemistry

| Case      | Cytogenetics                                                                                                                                           | Subtypes                 | Clinical course | Sex Age | CD19 | CD34 | TdT | CD79A | μHC | BCL6 |
|-----------|--------------------------------------------------------------------------------------------------------------------------------------------------------|--------------------------|-----------------|---------|------|------|-----|-------|-----|------|
| BM10-1463 | t(1;19)(q23;p13.3)                                                                                                                                     | <i>TCF3-PBX1</i>         | diagnosis       | m/53    | +    | -    | +   | -     | +   | +    |
| BM08-879  | t(1;19)(q23;p13.3)                                                                                                                                     | <i>TCF3-PBX1</i>         | diagnosis       | f/9     | +    | -    | +   | +     | +   | +    |
| BM04-137  | t(1;19)(q23;p13.3)                                                                                                                                     | <i>TCF3-PBX1</i>         | diagnosis       | f/27    | +    | -    | +   | +     | +   | +    |
| BM07-117  | t(1;19)(q23;p13.3)                                                                                                                                     | <i>TCF3-PBX1</i>         | diagnosis       | f/1     | +    | -    | -   | +     | +   | +    |
| BM07-554  | t(1;19)(q23;p13.3)                                                                                                                                     | <i>TCF3-PBX1</i>         | diagnosis       | m/73    | +    | -    | -   | +     | +   | +    |
| HP11-480  | dup(1)(q23q32)                                                                                                                                         | 1q gain ( <i>PBX1</i> )  | diagnosis       | m/73    | +    | -    | -   | +     | +   | +    |
| BM10-340  | -7, del(6)(q15q25), add(9)(p13), del(9)(p21), -20                                                                                                      | del(6)(q21)              | diagnosis       | m/36    | +    | -    | +   | +     | +   | +    |
| BM09-1426 | hypodiploid 37,XY,-2,-3,-4,-5, del(6)(q13q23), add(11)(q25), -12,-13,-14,-16,-                                                                         | Hypodiploid, del(6)(q21) | diagnosis       | m/13    | +    | -    | +   | +     | +   | +    |
| BM08-746  |                                                                                                                                                        | Hyperdiploid             | diagnosis       | m/4     | +    | -    | +   | +     | +   | +    |
| HP12-71   | 54,XY,+X,+4,+6,+14,?(17)(q10),+18,+21,+21                                                                                                              | Other                    | diagnosis       | m/4     | +    | -    | +   | +     | +   | +    |
| HP12-802  | 45,XX, dic (12;14)(p11.1;q13)                                                                                                                          | Other                    | diagnosis       | f/2     | +    | -    | +   | -     | +   | +    |
| HP13-1026 | 46,XX,+X,-7, del(9)(p21),add(20)(p13)                                                                                                                  | Other                    | diagnosis       | f/37    | +    | -    | +   | +     | +   | +    |
| BM11-817  | t(9;22)                                                                                                                                                | <i>BCR-ABL1</i>          | diagnosis       | f/63    | +    | +    | +   | -     | -   | -    |
| BM08-399  | t(9;22)                                                                                                                                                | <i>BCR-ABL1</i>          | diagnosis       | m/25    | +    | +    | +   | +     | -   | -    |
| BM08-1187 | t(9;22), -7, b2a2                                                                                                                                      | <i>BCR-ABL1</i>          | diagnosis       | m/68    | +    | +    | +   | +     | -   | -    |
| HP11-249  | 46,XX,t(9;22)(q34;q11)                                                                                                                                 | <i>BCR-ABL1</i>          | diagnosis       | f/52    | +    | +    | +   | -     | -   | -    |
| HP13-544  | 46, XY, t(9;22)(q34;q11.2)                                                                                                                             | <i>BCR-ABL1</i>          | diagnosis       | m/47    | +    | +    | +   | +     | -   | -    |
| BM10-1136 | 44,X,-X,-7,t(9;22)                                                                                                                                     | <i>BCR-ABL1</i>          | diagnosis       | f/43    | +    | +    | +   | -     | -   | -    |
| BM11-409  | t(9;22), p210+                                                                                                                                         | <i>BCR-ABL1</i>          | diagnosis       | f/32    | +    | +    | +   | -     | -   | -    |
| HP11-661  | t(12;21), 46,XX normal                                                                                                                                 | <i>ETV6-RUNX1</i>        | diagnosis       | f/4     | +    | +    | +   | +     | -   | -    |
| HP11-907  | t(12;21),46,XY,add(4)(q35),der(6)t(6;17)(q13;q11.2),del(12)(p11.2p13),17,+mar[13]/47,XY,add(4)(p16),der(6)t(6;17)(q13;q11.2),-17,+?16,+mar[2]/46,XY[5] | <i>ETV6-RUNX1</i>        | diagnosis       | m/3     | +    | +    | +   | +     | -   | -    |
| BM11-173  | t(12;21)                                                                                                                                               | <i>ETV6-RUNX1</i>        | diagnosis       | f/3     | +    | +    | +   | -     | -   | -    |
| BM11-413  | t(12;21)                                                                                                                                               | <i>ETV6-RUNX1</i>        | diagnosis       | m/2     | +    | +    | +   | +     | -   | -    |
| BM11-510  | t(12;21)                                                                                                                                               | <i>ETV6-RUNX1</i>        | diagnosis       | m/4     | +    | +    | +   | -     | -   | -    |
| BM11-755  | t(12;21)                                                                                                                                               | <i>ETV6-RUNX1</i>        | diagnosis       | f/8     | +    | +    | +   | -     | -   | -    |
| BM08-384  |                                                                                                                                                        | hyperdiploid             | diagnosis       | m/2     | +    | +    | +   | -     | -   | -    |
| BM08-1174 |                                                                                                                                                        | hyperdiploid             | diagnosis       | f/3     | +    | +    | +   | +     | -   | -    |
| BM09-678  |                                                                                                                                                        | hyperdiploid             | diagnosis       | m/10    | +    | +    | +   | +     | -   | -    |
| BM09-1511 |                                                                                                                                                        | hyperdiploid             | diagnosis       | m/4     | +    | +    | +   | +     | -   | -    |
| BM09-1303 |                                                                                                                                                        | hyperdiploid             | diagnosis       | m/6     | +    | +    | +   | +     | -   | -    |
| BM10-332  |                                                                                                                                                        | hyperdiploid             | diagnosis       | f/5     | +    | +    | +   | +     | -   | -    |
| BM08-884  |                                                                                                                                                        | hyperdiploid             | diagnosis       | f/6     | +    | +    | +   | +     | -   | -    |
| BM08-1426 |                                                                                                                                                        | Other                    | diagnosis       | f/35    | +    | +    | +   | +     | -   | -    |
| BM08-387  |                                                                                                                                                        | Other                    | diagnosis       | f/4     | +    | +    | +   | -     | -   | -    |
| BM08-400  |                                                                                                                                                        | Other                    | diagnosis       | m/22    | +    | +    | +   | +     | -   | -    |
| BM08-449  |                                                                                                                                                        | Other                    | diagnosis       | f/3     | +    | -    | +   | +     | -   | -    |
| BM08-501  |                                                                                                                                                        | Other                    | diagnosis       | m/4     | +    | +    | +   | -     | -   | -    |
| BM08-658  |                                                                                                                                                        | Other                    | diagnosis       | m/17    | +    | +    | +   | +     | -   | -    |
| BM08-786  |                                                                                                                                                        | Other                    | diagnosis       | f/16    | +    | +    | +   | +     | -   | -    |
| BM08-877  |                                                                                                                                                        | Other                    | diagnosis       | m/19    | +    | +    | +   | +     | -   | -    |
| BM09-109  |                                                                                                                                                        | Other                    | diagnosis       | f/2     | +    | +    | +   | +     | +   | -    |
| BM09-214  | +X,add(8)(p?12),der(20;21)(p10;q10)                                                                                                                    | Other                    | diagnosis       | m/49    | +    | +    | +   | +     | -   | -    |
| BM09-507  |                                                                                                                                                        | Other                    | diagnosis       | m/20    | +    | +    | +   | +     | -   | -    |
| BM10-1011 | +gain AML1                                                                                                                                             | Other                    | diagnosis       | m/3     | +    | +    | +   | -     | +   | -    |
| BM10-1150 | +4, 10, 17                                                                                                                                             | Other                    | diagnosis       | m/4     | +    | +    | +   | -     | -   | -    |
| BM10-1156 | +X,4,6,10,18,21                                                                                                                                        | Other                    | diagnosis       | m/5     | +    | +    | +   | -     | -   | -    |
| BM10-1187 | +4,10,17                                                                                                                                               | Other                    | diagnosis       | f/5     | +    | +    | +   | -     | -   | -    |
| BM10-1337 | +4,10,17                                                                                                                                               | Other                    | diagnosis       | m/2     | +    | +    | +   | -     | -   | -    |
| BM10-1373 | +4,17 (not 10)                                                                                                                                         | Other                    | diagnosis       | m/2     | +    | +    | +   | -     | -   | -    |

| Case      | Cytogenetics                                                                                        | Subtypes | Clinical course | Sex Age | CD19 | CD34 | TdT | CD79A | μHC | BCL6 |
|-----------|-----------------------------------------------------------------------------------------------------|----------|-----------------|---------|------|------|-----|-------|-----|------|
| BM10-1503 |                                                                                                     | Other    | diagnosis       | f/56    | +    | +    | +   | -     | -   | -    |
| BM10-1544 |                                                                                                     | Other    | diagnosis       | f/18    | +    | -    | +   | -     | -   | -    |
| BM10-445  |                                                                                                     | Other    | diagnosis       | m/0.3   | +    | +    | +   | -     | -   | -    |
| BM10-673  | Partial del 9q                                                                                      | Other    | diagnosis       | m/8     | +    | +    | -   | -     | -   | -    |
| BM11-228  | +4,10 (not17)                                                                                       | Other    | diagnosis       | m/9     | +    | +    | +   | -     | -   | -    |
| BM11-343  | +4,10,17                                                                                            | Other    | diagnosis       | f/3     | +    | +    | +   | -     | -   | -    |
| HP11-24   |                                                                                                     | Other    | diagnosis       | f/11    | +    | +    | +   | -     | -   | -    |
| HP11-575  |                                                                                                     | Other    | diagnosis       | f/31    | +    | +    | +   | +     | -   | -    |
| HP11-790  |                                                                                                     | Other    | diagnosis       | m/29    | +    | +    | +   | +     | -   | -    |
| HP12-1014 |                                                                                                     | Other    | Relapse         | f/43    | +    | -    | +   | +     | -   | -    |
| HP12-1499 | 46, XX                                                                                              | Other    | diagnosis       | f/9     | +    | -    | +   | +     | -   | -    |
| BM10-1425 | trisomy 1                                                                                           | Other    | diagnosis       | f/9     | +    | +    | +   | -     | -   | -    |
| HP12-49   | 46,XY,t(1;14)(q25;q32),del(4)(q12q?25),del(12)(q21q22),+19[3]/46,XY[4]                              | Other    | diagnosis       | m/10    | +    | -    | +   | +     | -   | -    |
| HP12-1722 | 59-60. XY. +4. +5. +6. +8. +1-, +13, +14, +15, +17, +18, +21, +21[cp2]/46, XY [13]                  | Other    | diagnosis       | m/2     | +    | +    | +   | +     | -   | -    |
| HP12-1724 | 46, XX, add(4), (p14)[3]/46,xx[17]                                                                  | Other    | diagnosis       | f/14    | +    | +    | +   | +     | -   | -    |
| HP12-446  | no cyto division                                                                                    | Other    | diagnosis       | m/22    | +    | +    | +   | +     | -   | -    |
| HP12-657  | 46, XY, add(14)(q32)[6]/46,XY [14]                                                                  | Other    | diagnosis       | m/20    | +    | +    | +   |       |     | -    |
| HP12-924  |                                                                                                     | Other    | diagnosis       | f/3     | +    | +    | -   | +     | -   | -    |
| HP13-135  | 45,-X, -x?c[6]/46,XX[14].nuc ish (CEP8x2)[194],(RUNX11T1,RUNX1)x2[181],(ABL1,BCR)x2[176],(MLLx2)190 | Other    | Relapse         | f/23    | +    | +    |     |       | -   | -    |
| HP13-362  | 46, XY [26]                                                                                         | Other    | diagnosis       | m/53    | +    | +    | +   | +     | -   | -    |
| HP13-495  | 46, XY [20]                                                                                         | Other    | diagnosis       | m/22    | +    | -    | +   | +     | -   | -    |
| HP13-628  | 54,XY, +X, +4, +6, +8, +14, +17, +21 [cp2]/46,XY[9]                                                 | Other    | diagnosis       | m/1     | +    | +    | +   | +     | -   | -    |



**Table S8. Related to Figure 4. 1q23 abnormalities in human ALL and mature B-cell lymphoma****Rearrangements of 1q23 to Non-TCF3 fusion partners in human ALL**

| Case | Reference                                         | Karyotype                                                                                                                                                                                                         | 1q23        |
|------|---------------------------------------------------|-------------------------------------------------------------------------------------------------------------------------------------------------------------------------------------------------------------------|-------------|
| 3    | Harewood 2003, Leukemia 17:547-553                | 46,XY,t(1;16)(q23;p13),ider(21)(q10)dup(21)(q?)/51,idem,+X,+3,+10,+14,+21                                                                                                                                         | PBX1-rearr. |
| 3    | Gutierrez-Angulo 2004, Hematol Oncol 22:85-90     | 46,XY,t(1;9)(q23;q34)                                                                                                                                                                                             | PBX1-rearr. |
| 4    |                                                   | 46,XY,t(1;19)(q23;p13)/46,idem,dup(1)(q23q44)                                                                                                                                                                     | PBX1-rearr. |
| 31   | Einerson 2005, Am J Clin Pathol 124:421-429       | 46,XY,der(1)t(1;1)(p36;q23),der(9)t(7;9)(p15;p22),t(14;18)(q32;q21)                                                                                                                                               | PBX1-rearr. |
| 1    | Bilic 2007, Cancer Genet Cytogenet 172:90-91      | 46,XX,der(15)t(1;15)(q23;q26)                                                                                                                                                                                     | PBX1-rearr. |
| 64   | Adeyinka 2007, Cancer Genet Cytogenet 173:136-143 | 45-46,XX,t(9;13)(q21;q22),+13,der(17;21)(q10;q10)/46-47,XX,t(1;13)(q23;q14),del(2)(q34),del(7)(q22q32),+15,add(22)(p11)/45-46,XX,del(2),t(3;14)(p21;q21),del(7),der(13;15)(q10;q10),-14,add(17)(p13),add(22),+mar | PBX1-rearr. |
| 3131 | Rand 2011, Blood 117:6848-6855                    | 46,XY,t(1;16)(q23;p13),ider(21)(q10)dup(21)(q?)/51,idem,+X,+3,+10,+14,+21                                                                                                                                         | PBX1-rearr. |
| 1    | Inokuchi 2011, Int J Hematol 94:255-260           | 46,XY,t(1;9)(q23;q34),inv(2)(p21q33)                                                                                                                                                                              | PBX1-rearr. |
| 1    | Fonatsch 1982, Int J Cancer 30:321-327            | 46,XY,del(2)(p21),inv(2)(p11q13),ins(11;3)(q23;p12p21),t(8;22)(q24;q12)/46,XY,dup(1)(q23q44),t(8;22)                                                                                                              | dup PBX1    |
| 3    | Childs 1988, Hematol Pathol 2:145-157             | 51,XX,+X,+del(4)(q21),t(4;11)(q21;q23),+6,der(15)t(1;15)(q23;q26),+22,+22                                                                                                                                         | PBX1-rearr. |
| 12   | Berger 1990, Cancer Genet Cytogenet 44:69-75      | 46,XY,add(1)(p34),t(1;14)(q23;q32),del(2)(p12p23),-3,del(12)(p12)                                                                                                                                                 | PBX1-rearr. |
| 46   | Pui 1992, Blood 79:2384-2391                      | 46,XY,i(7)(q10),der(19)t(1;19)(q23;p13)/46,idem,der(22)t(1;22)(q23;p11)                                                                                                                                           | PBX1-rearr. |
| 18   | Heerema 1992, Leukemia 6:185-192                  | 62,XXY,-1,dup(1)(q23q44),-2,-3,-7,-8,-15,-16,-19,-20,+21,+21                                                                                                                                                      | dup PBX1    |
| 708  | Secker-Walker 1992, Leukemia 6:363-369            | 54,XY,+X,+4,+6,+7,+8,+17,der(19)t(1;19)(q23;p13),+21,+21/54,idem,dup(1)(q23q44)                                                                                                                                   | PBX1-rearr. |
| 415  | Tilly 1994, Blood 84:1043-1049                    | 46,XX,der(1)t(1;1)(p36;q23),der(2)dup(2)(p12p25)t(2;18)(p12;q21),add(1)(p11),i(17)(q10)                                                                                                                           | PBX1-rearr. |
| 22   | Fegan 1995, Leukemia 9:2003-2008                  | 46,XY,t(1;13)(q23;q14),t(13;14)(q12;q24)                                                                                                                                                                          | PBX1-rearr. |
| 1    | Jarvis 1999, Cancer Genet Cytogenet 114:112-116   | 46,XY,der(1)t(1;1)(q23;q32)/46,XY,der(22)t(1;22)(q23;p11)                                                                                                                                                         | PBX1-rearr. |
| 17   | Lim 1999, Int J Mol Med 4:665-667                 | 46-49,XY,t(1;14)(q23;q32),del(7),+18,+21                                                                                                                                                                          | PBX1-rearr. |
| 137  | Horsman 2001, Genes Chromosomes Cancer 30:375-382 | 46,XY,der(1)t(1;1)(p36;q23)                                                                                                                                                                                       | PBX1-rearr. |
| 1    | Carroll 1984, Blood 63:721-724                    | 46,XY,t(1;19)(q23;q13),der(19)t(1;19)                                                                                                                                                                             | PBX1-rearr. |
| 2    |                                                   | 47,XX,t(1;19)(q23;q13),+8                                                                                                                                                                                         | PBX1-rearr. |
| 3    |                                                   | 47,XY,+6,der(19)t(1;19)(q23;q13)                                                                                                                                                                                  | PBX1-rearr. |

**1q23 abnormalities in mature B-cell lymphoma (n=47)**

| Case  | Reference                                      | Disease | Karyotype                                                                                                                                                                      | 1q23     |
|-------|------------------------------------------------|---------|--------------------------------------------------------------------------------------------------------------------------------------------------------------------------------|----------|
| 6     | Horsman 2003, Br J Haematol 120:424-433        | FL      | 48,XX,+del(X)(q11q?24),dup(1)(q21q23),+der(3)t(3;14)(q27;q32),t(3;14)                                                                                                          | dup PBX1 |
| 10904 | Namiki 2003, Int J Hematol 77:490-498          | BL      | 46,XY,dup(1)(q23q44),t(8;14)(q24;q32)                                                                                                                                          | dup PBX1 |
| 5850  | Cook 2004, Am J Clin Pathol 121:826-835        | FL      | 45,X,-X,t(14;18)(q32;q21)/45,idem,dup(1)(q21q23)/90,idemx2,dup(1)x2                                                                                                            | dup PBX1 |
| 39    | Yunis 1984, Cancer Genet Cytogenet 13:17-28    | B-NHL   | 48,XX,dup(1)(q23q32),t(2;19)(p15p23;q13),+3,inv(7)(p15q11),+18,del(19)(q13)                                                                                                    | dup PBX1 |
| 34    | Ruminy 2006, Oncogene 25:4947-4954             | FL      | 46,XY,dup(1)(q12q23),t(3;14)(q27;q32),der(9)t(9;9)(p24;q23)                                                                                                                    | dup PBX1 |
| 602   | Struski 2007, Pathol Biol (Paris) 55:59-72     | B-NHL   | 47,XY,dup(1)(q23q32),+3,del(9)(q11q?32)/48,idem,+mar                                                                                                                           | dup PBX1 |
| 11    | Tholouli 2009, Blood 114:485-486               | BL      | 46,XY,dup(1)(q23q32),t(8;22)(q24;q32),del(9)(q12q22)                                                                                                                           | dup PBX1 |
| 11    | Sanger 1987, Cancer 60:3014-3019               | FL      | 67-70,XXX,dup(1)(q23),-2,t(3;6)(q27;q15),-4,+7,+del(7)(q21),-8,t(14;18)(q32;q21),+der(14)t(14;18)x2,-15,-16,+17,-18,-19,+20,-21,-22,+mar                                       | dup PBX1 |
| 7     | Olah 1989, Cancer Genet Cytogenet 43:179-194   | BL      | 47,XY,t(8;14)(q24;q32),+mar/46,XY,t(2;8)(p13;q23)/47,XY,+del(1)(q12),dup(1)(q23q32),t(1;1)(q32;q32)                                                                            | dup PBX1 |
| 1     | Slater 1979, Int J Cancer 23:639-647           | BL      | 46,XY,dup(1)(q23q32),t(1;6)(q21;q13),del(6)(q13),del(8)(p21),add(14)(q32)                                                                                                      | dup PBX1 |
| 50    | Nowotny 1996, Ann Hematol 72:291-301           | DLBCL   | 49,X,-Y,+X,dup(1)(q23q31),+3,del(4)(p16),add(6)(p23),del(6)(q13q35),t(12;14)(q24;q32),+18                                                                                      | dup PBX1 |
| 60    |                                                | DLBCL   | 47,XX,dup(1)(q23q31),t(2;7)(q12;q21),dic(3;6)(q23;q27),+7,add(7)(p22)x2,add(9)(q34),t(12;20)(p10;q10),t(12;16)(q15;q13),-13,+der(19)/47,idem,dic(1;9)(q44;q10),del(13)(q13q31) | dup PBX1 |
| 2432  | Koduru 1997, Blood 90:4078-4091                | DLBCL   | 45,X,add(X)(q21),add(1)(q23),add(2)(p11),del(3)(q13),t(3;14)(q27;q32),i(8)(q10),add(12)(q24),-15                                                                               | dup PBX1 |
| 1     | Slater 1982, Med Pediatr Oncol 10:71-84        | BL      | 46,XX,dup(1)(q23q32),del(3)(p25),t(8;14)(q24;q32)                                                                                                                              | dup PBX1 |
| 15    | Fukuhara 1983, Jpn J Clin Oncol 13:461-476     | BL      | 46,XY,dup(1)(q23q32),t(8;14)(q24;q32)                                                                                                                                          | dup PBX1 |
| 24    | Mohamed 2001, Cancer Genet Cytogenet 126:45-51 | FL      | 46,XY,add(1)(p36),t(14;18)(q32;q21)/46,idem,dup(1)(q23q42)/47,idem,+2                                                                                                          | dup PBX1 |
| 33    |                                                | FL      | 45,X,-Y,dup(1)(q23q42),-4,+7,t(14;18)(q32;q21)                                                                                                                                 | dup PBX1 |
| 8     | Jardin 2002, Leukemia 16:2309-2317             | FL      | 46,XY,dup(1)(q12q23),t(3;14)(q27;q32),der(9)t(9;9)(p24;q23)                                                                                                                    | dup PBX1 |
| 12    | Kumari 2003, Cancer Genet Cytogenet 141:14-    | DLBCL   | 43-45,XY,-1,add(1)(q23),dup(1)(q21q31),add(2)(p21),                                                                                                                            | dup PBX1 |

|      |                                                      |       |                                                                                                                                                                                                                                                                                                                                                                                                                                           |             |
|------|------------------------------------------------------|-------|-------------------------------------------------------------------------------------------------------------------------------------------------------------------------------------------------------------------------------------------------------------------------------------------------------------------------------------------------------------------------------------------------------------------------------------------|-------------|
| 19   |                                                      |       | add(18)(q21)                                                                                                                                                                                                                                                                                                                                                                                                                              |             |
| 16   |                                                      | DLBCL | 47-49,X,-X, <b>add(1)(q23)</b> ,del(3)(p12)x2,+add(12)(q13),-18,+19,+20,-21,+22,+2mar                                                                                                                                                                                                                                                                                                                                                     | dup PBX1    |
| 67   | Bloomfield 1983 , Cancer Res 43:2975-2984            | DLBCL | 49,XY,del(1)(p36),der(3)t(1;3)(q23;p26),+del(9)(q22), <b>der(14)t(1;14)(q23;q32)</b> ,+19,+21                                                                                                                                                                                                                                                                                                                                             | PBX1-IGH    |
| 8136 | Cook 2004 , Am J Clin Pathol 121:826-835             | FL    | 87-93,XXYY,t(1;19)(q23;p13)x2,del(3)(q21q25)x2,add(4)(q35),-7,inv(9)(p11q13)x2,del(10)(q24)x2,-14,t(14;18)(q32;q21)x2,del(15)(q24)x2,-17,der(19)t(1;19),-20,+2mar                                                                                                                                                                                                                                                                         | PBX1-rearr. |
| 31   | Einerson 2005, Am J Clin Pathol 124:421-429          | FL    | 46,XY, <b>der(1)t(1;1)(p36;q23)</b> ,der(9)t(7;9)(p15;p22),t(14;18)(q32;q21)                                                                                                                                                                                                                                                                                                                                                              | PBX1-rearr. |
| 1    | Li 2006 , Cancer Genet Cytogenet 170:140-146         | BL    | 47-48,XY,t(3;14;18),add(4)(q35),add(6)(q27), <b>der(13)t(1;13)(q23;q34)</b> ,+18                                                                                                                                                                                                                                                                                                                                                          | PBX1-rearr. |
| 64   | Adeyinka 2007, Cancer Genet Cytogenet 173:136-143    | CLL   | 45-46,XX,t(9;13)(q21;q22),+13,der(17;21)(q10;q10)/46-47,XX,t(1;13)(q23;q14),del(2)(q34),del(7)(q22q32),+15,add(2)(p11)/45-46,XX,del(2),t(3;14)(p21;q21),del(7),der(13;15)(q10;q10),-14,add(17)(p13),add(22),+mar                                                                                                                                                                                                                          | PBX1-rearr. |
| 3    | Berger 1989, Genes Chromosomes Cancer 1:115-118      | BL    | 46,XY,t(8;14)(q24;q32),der(13)t(3;13)(?;q34)/46,XY,t(8;14), <b>der(13)t(1;13)(q23;q34)ins(13;?)q34;?)</b>                                                                                                                                                                                                                                                                                                                                 | PBX1-rearr. |
| 4    |                                                      | BL    | 46,XX,t(8;14)(q24;q32)/46,idem, <b>der(13)t(1;13)(q23;q34)</b>                                                                                                                                                                                                                                                                                                                                                                            | PBX1-rearr. |
| 10   | Mark 1979 , Cancer Genet Cytogenet 1:39-56           | DLBCL | 82,XX,-X,del(X)(q13),+i(1)(p10)x2,+i(1)(q10),-2,-3,-5,del(7)(p11)x2,-8,-8,i(9)(p10),-10,-12,-13,+del(14)(q22), <b>der(14)t(1;14)(q23;q32)x4</b> ,+15,i(15)(q10),-16,-16,-16,i(17)(q10),-19,-19,-20,+2mar                                                                                                                                                                                                                                  | PBX1-rearr. |
| 415  | Tilly 1994, Blood 84:1043-1049                       | FL    | 46,XX, <b>der(1)t(1;1)(p36;q23)</b> ,der(2)dup(2)(p12p25)t(2;18)(p12;q21),add(16)(p11),i(17)(q10),der(18)t(2;18)/46,XX,der(1)t(1;1),der(2)dup(2)t(2;18),t(4;15)(q21;q11),add(11)(q23),t(13;16)(q14;p12),i(17)(q10),der(18)t(2;18)                                                                                                                                                                                                         | PBX1-rearr. |
| 22   | Fegan 1995, Leukemia 9:2003-2008                     | CLL   | 46,XY,t(1;13)(q23;q14),t(13;14)(q12;q24)                                                                                                                                                                                                                                                                                                                                                                                                  | PBX1-rearr. |
| 1    | Meckenstock 1997 , Leuk Lymphoma 26:197-204          | B-NHL | 47,XY,+3/47,idem, <b>der(1)t(1;1)(p36;q23)/46,idem</b> ,+Y,der(1)                                                                                                                                                                                                                                                                                                                                                                         | PBX1-rearr. |
| 51   | Dave 1999 , Clin Cancer Res 5:1401-1409              | B-NHL | 52,XY, <b>der(1)t(1;1)(p36;q23)</b> ,+5,+7,+13,t(14;18)(q32;q21),+18,+der(18)t(14;18),+mar                                                                                                                                                                                                                                                                                                                                                | PBX1-rearr. |
| 14   | Fukuhara 1983, Jpn J Clin Oncol 13:461-476           | BL    | 46,X, <b>der(X)t(X;1)(p11;q23)</b> ,t(8;14)(q24;q32)/47,idem,+mar/4                                                                                                                                                                                                                                                                                                                                                                       | PBX1-rearr. |
| 137  | Horsman 2001, Genes Chromosomes Cancer 30:375-382    | FL    | 46,XY,t(14;18)(q32;q21)/46,idem, <b>der(1)t(1;1)(p36;q23)</b>                                                                                                                                                                                                                                                                                                                                                                             | PBX1-rearr. |
| 1    | Murphy 1984, N Engl J Med 311:195-196                | BL    | 46,XY,t(8;14)(q24;q32)/46,idem,add(1)(q?) /46,idem, <b>der(19)t(1;19)(q23;p13)</b>                                                                                                                                                                                                                                                                                                                                                        | TCF3-PBX1   |
| 2    | Wlodarska 1994 , Genes Chromosomes Cancer 10:171-176 | BL    | 47,XY,+1,add(2)(p25),t(8;14)(q24;q32),del(13)(q21q31),t(14;18)(q32;q21),del(17)(p12),t(20;22)(q13;q11)/47,idem,del(19)(p12)/47,idem, <b>der(19)t(1;19)(q23;p13)</b>                                                                                                                                                                                                                                                                       | TCF3-PBX1   |
| 1    | Lessard 1994, Leuk Lymphoma 11:149-152               | BL    | 50,XY,t(1;19)(q23;p13),+4,+8,del(9)(p?),+10,del(12)(p?),+17                                                                                                                                                                                                                                                                                                                                                                               | TCF3-PBX1   |
| 3    |                                                      | BL    | 46,XX,t(1;19)(q23;p13)                                                                                                                                                                                                                                                                                                                                                                                                                    | TCF3-PBX1   |
| 4    |                                                      | BL    | 51,XY,t(1;19)(q23;p13),+5,+8,+10,+21,+22                                                                                                                                                                                                                                                                                                                                                                                                  | TCF3-PBX1   |
| 5    |                                                      | BL    | 46,XY,t(1;19)(q23;p13),t(1;17)                                                                                                                                                                                                                                                                                                                                                                                                            | TCF3-PBX1   |
| 5    | Devaraj 1995, Leukemia 9:821-825                     | BL    | 46,XY,?dup(7)(q1q22),t(8;14)(q24;q32)/46,idem,?dup(10)(q1q26)/46,XY,?trp(7)(q11q22),t(8;14), <b>der(19)t(1;19)(q23;p13)add(1)(q?)</b>                                                                                                                                                                                                                                                                                                     | TCF3-PBX1   |
| 3    | Khokhar 1995, Cancer Genet Cytogenet 83:18-24        | FL    | 47,XY,t(1;19)(q23;p13),+del(3)(p21),dup(11)(q13q25), <b>der(19)t(1;19)(q23;p13)</b>                                                                                                                                                                                                                                                                                                                                                       | TCF3-PBX1   |
| 1    | Troussard 1995 , Br J Haematol 89:516-526            | BL    | 47,XX,t(1;19)(q23;p13),+8,del(9)(p22)                                                                                                                                                                                                                                                                                                                                                                                                     | TCF3-PBX1   |
| 8    |                                                      | BL    | 47,XX,t(1;19)(q23;p13),+8/46,XX,der(19)t(1;19)                                                                                                                                                                                                                                                                                                                                                                                            | TCF3-PBX1   |
| 50   | Petkovic 1996, Cancer Genet Cytogenet 88:57-65       | BL    | 46,XX,t(7;13)(p2?;q2?), <b>der(19)t(1;19)(q23;p13)/47</b> ,idem,+mar                                                                                                                                                                                                                                                                                                                                                                      | TCF3-PBX1   |
| 1    | Ichinohasama 2000 , Leukemia 14:169-182              | DLBCL | 66-82,XXYY,-1,del(1)(p32),dup(1)(q23),i(1)(q10),-2,add(2)(q10),add(3)(p11),+der(3)add(3)t(3;18)(q27;q21),t(3;18)x3,-4,der(4)t(4;22)(p16;q11)del(4)(q31),der(4)t(4;22)add(4)(q35),-5,-6,del(6)(p21)x2,der(6)t(6;14)(q15;q11),-7,-7,-8,add(8)(p23),-9,-10,der(11)t(?;11)(p11;q12)x2,del(12)(p13)x2,add(13)(q34),der(14)t(X;14)(q13;q32),-15,add(17)(p11),add(19)(q13), <b>der(19)t(1;19)(q23;p13)</b> ,add(20)(q23),-21,der(22)t(4;22),+mar | TCF3-PBX1   |
| 12   | Velangi 2002, J Clin Pathol 55:591-595               | BL    | 47,XY,add(1)(p36),add(3)(q2?3),+7,t(14;18)(q32;q22),t(15;22)(q26;q21), <b>der(19)t(1;19)(q23;p13)</b>                                                                                                                                                                                                                                                                                                                                     | TCF3-PBX1   |
| 54   | López 2013, Genes Chromosomes Cancer 52:920-927      | CLL   | 46,XY,t(1;19)(q23;p13),der(7),+12,del(13)(q14q21),add(15)(p10),del(17)(p12)/46,XY,t(11;14)(q13;q32)                                                                                                                                                                                                                                                                                                                                       | TCF3-PBX1   |

**Note:** DLBCL: Diffuse large B-cell lymphoma; FL: Follicular lymphoma; BL: Burkitt's lymphoma; CLL: Chronic lymphocytic leukemia. B-NHL, B cell Non-Hodkin's lymphoma. The data were curated from Mitelman Database of Chromosome Aberrations and Gene Fusions in Cancer <http://cgap.nci.nih.gov/Chromosomes/Mitelman>



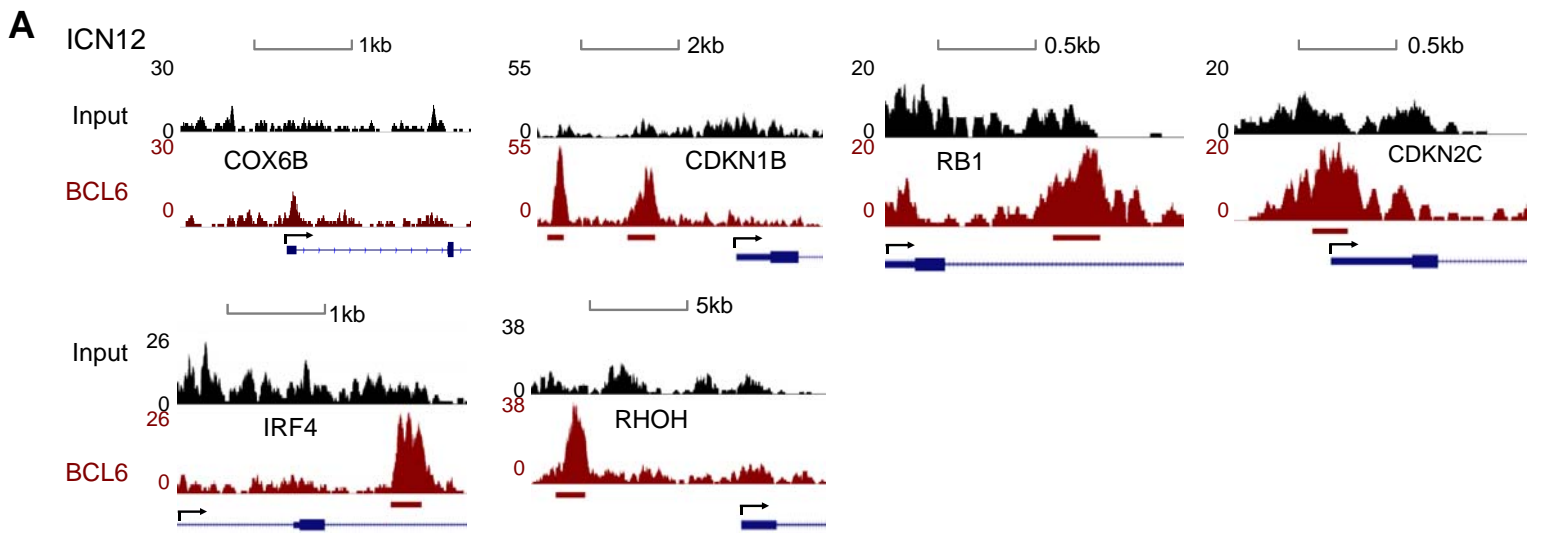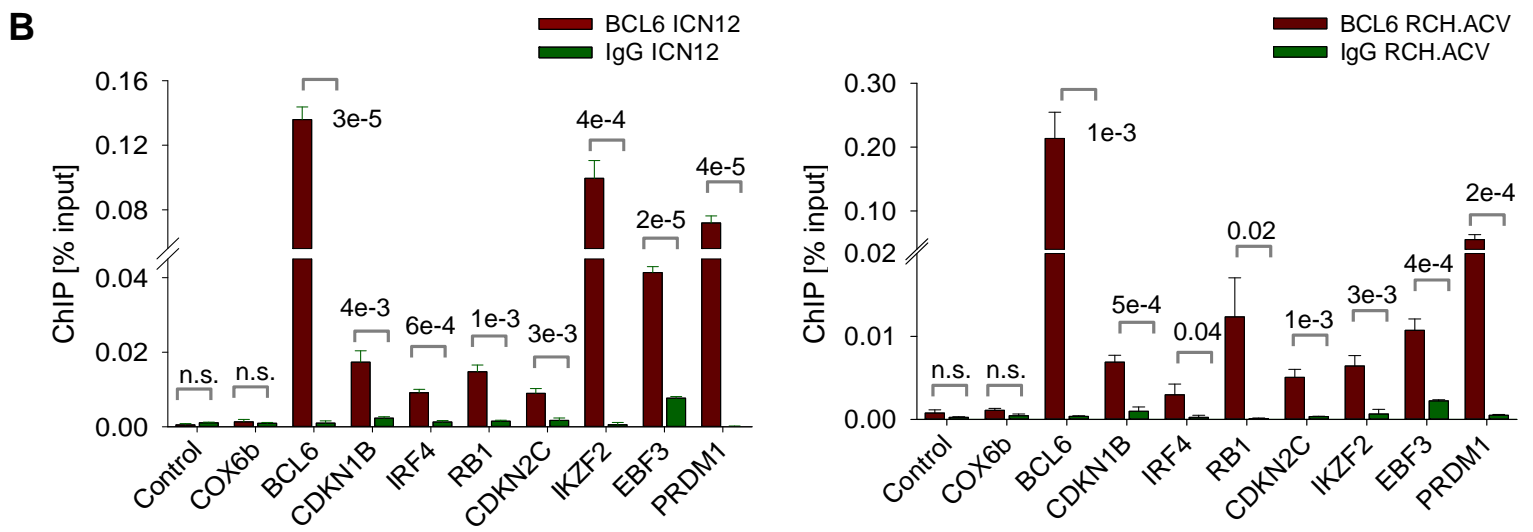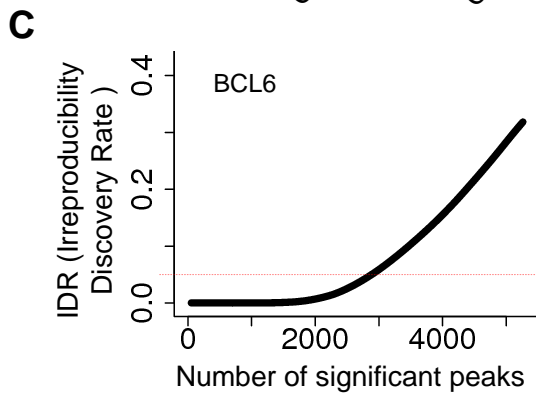

**D**

| ChIP-seq experiment | Total reads | Uniquely aligned reads | Number of peaks detected<br>IDR** <= 0.05 DR <= 0.1 | ChIPseeqer parameters   |
|---------------------|-------------|------------------------|-----------------------------------------------------|-------------------------|
| BCL6 (ICN12)        | 56,894,092  | 49,289,096             | 2,885      3,467                                    | -t 15 -f 2 -fraglen 170 |
| Input (ICN12)       | 48,961,598  | 38,399,594             |                                                     |                         |

**Figure S4. Related to Figure 5. BCL6 directly binds to a number of pre-BCR check point molecules.** (A) BCL6 ChIP-seq binding tracks on the target genes including pre-BCR checkpoint molecules (*RB1*, *CDKN2C*, *CDKN1B* and *IRF4*) in patient-derived *TCF3-PBX1* ALL cells (ICN12). Y axis represents the number of reads for peak summit normalized by the total number of reads per track. Gene models were shown in UCSC genome browser view hg18. The peak regions were called by ChIPseeqer program (Giannopoulou and Elemento, 2011). (B) QChIP validation on some BCL6 target genes using antibodies against BCL6 with IgG as a control in *TCF3-PBX1* ALL cells (ICN12 and RCH-ACV). An inactive intragenic control region and COX6b were used as negative controls. Y axis represents ChIP enrichment relative to input. Data represents means  $\pm$  SEM (n=3). P values from t-test. n.s. means non-significant ( $p>0.05$ ). (C) To estimate self-consistency and determine appropriate thresholds for binding sites peak calling, Irreproducibility Discovery Rate (IDR) analysis (Li et al. 2011; Landt et al. 2012) were performed for each mapped sample. The peaks under IDR 0.05 for each sample is considered as reproducible significant peaks. (D) Summary of number of reads and peaks detected in the BCL6 ChIP-seq experiment. Reads were aligned to hg18 using BWA with the default parameters (Li et al., 2009). Peaks called by ChIPseeqer program (Giannopoulou and Elemento, 2011). Peak threshold was determined by IDR (Li et al. 2011).

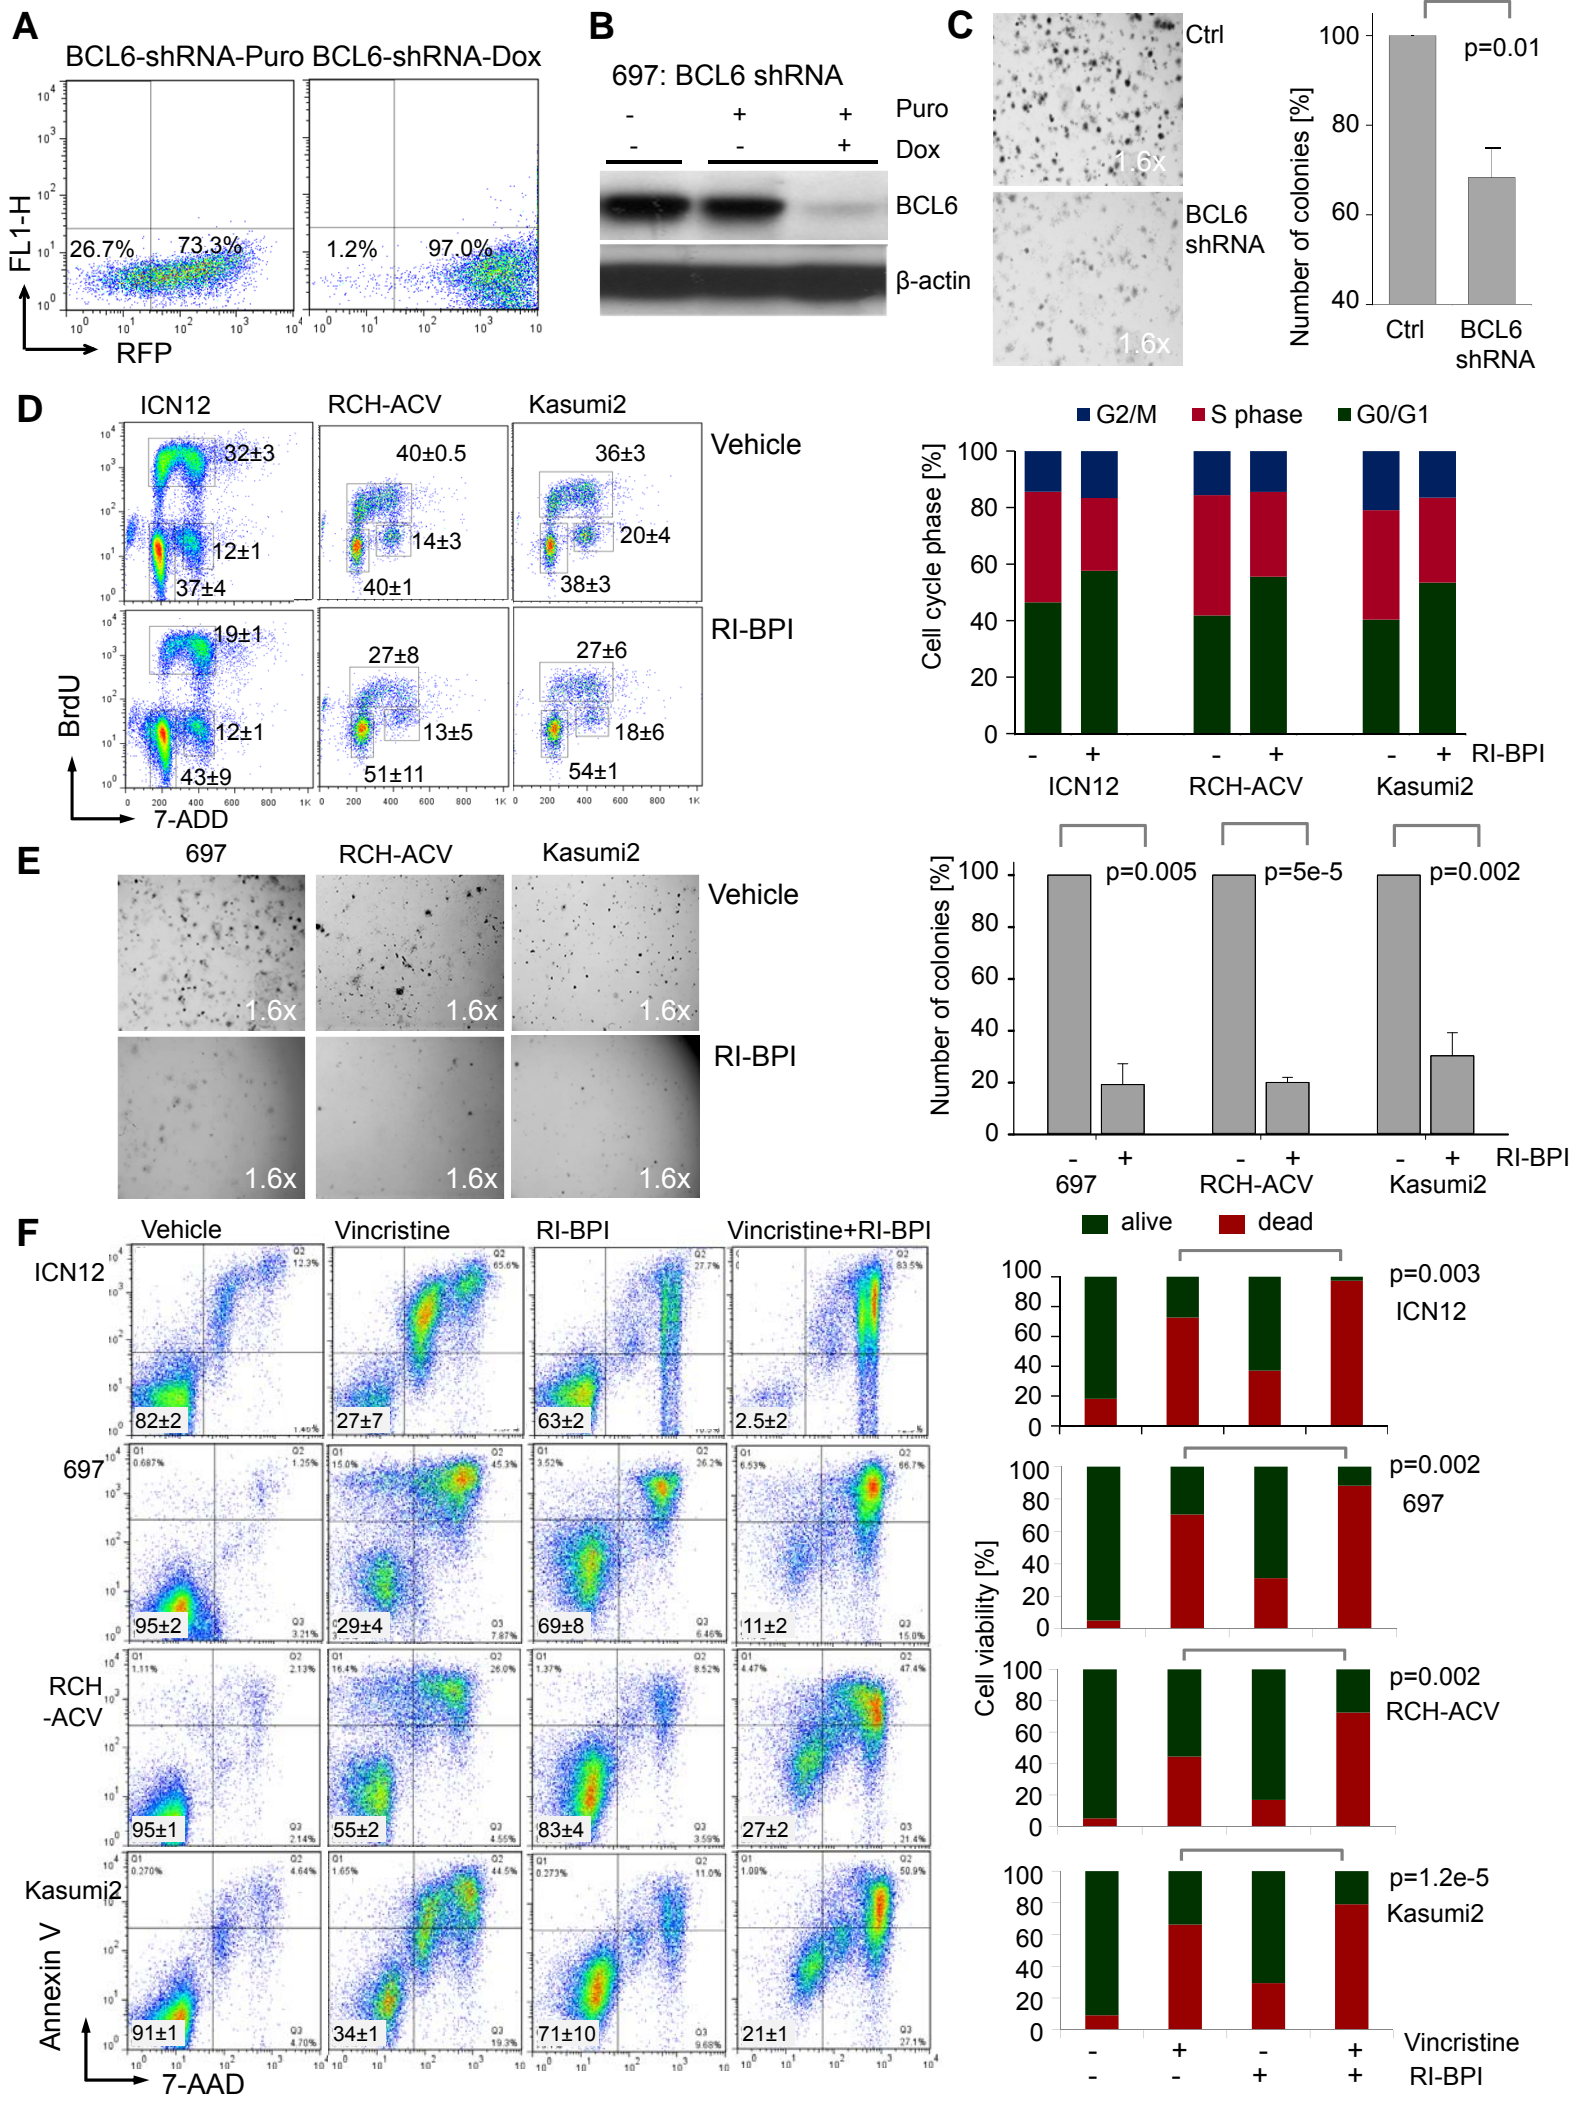

**Figure S5. Related to Figure 6. Inhibition of BCL6 via BCL6 shRNA and retro-inverso BCL6 peptide inhibition RI-BPI in human pre-BCR+ ALL cells.** (A) 697 cells were transduced with BCL6 shRNA (pCL6-TRRIP-BCL6-shRNA). Transduction efficiency with Puromycin selection and Doxycycline induction were verified by flow cytometry based on RFP. (B) BCL6 shRNA knockdown before and after Puro selection and Dox induction (0.5  $\mu\text{g}/\text{mL}$ , 72 hr) was validated by Western blot with  $\beta$ -actin as a loading control. (C) 10,000 doxycycline-treated or untreated 697 cells were plated in semi-solid methylcellulose agar and colonies were counted after 10 days. Y axis shows percent colony formation measured at day 10. Data represent means  $\pm$  SEM (n=3). P values from t-test. (D) Human pre-BCR<sup>+</sup> *TCF3-PBX1* ALL cells were exposed to 5  $\mu\text{M}$  retro-inverso BCL6 peptide-inhibitor (RI-BPI) or vehicle for 24 hr followed by BRDU or (E) 48 hr followed by colony formation assays. 10,000 cells were plated in semi-solid methylcellulose agar and colonies were counted after 10 days. (F) Human *TCF3-PBX1* ALL cells (ICN12, 697, RCH-ACV and Kasumi2) were treated for 72 hr with vehicle control, Vincristine (1 nM), RI-BPI (5  $\mu\text{M}$ ), or combination of Vincristine (1 nM) and RI-BPI (5  $\mu\text{M}$ ), followed by flow cytometry for Annexin V and 7-AAD staining. Bar plot data represents means of percentage of alive and dead cells. Data represent means  $\pm$  SEM (n=3). All p values were calculated by t-test.

**A**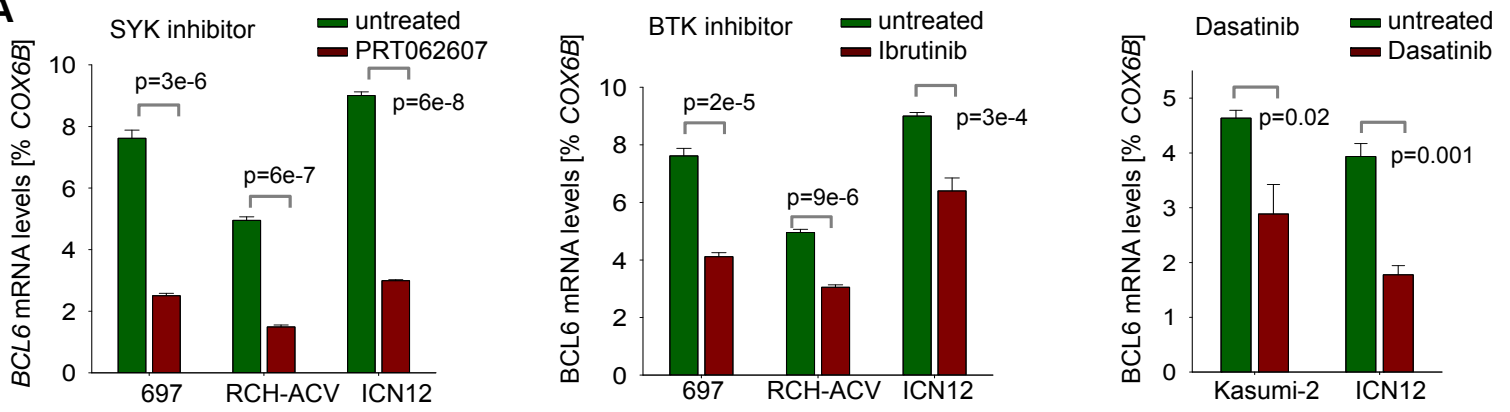**B**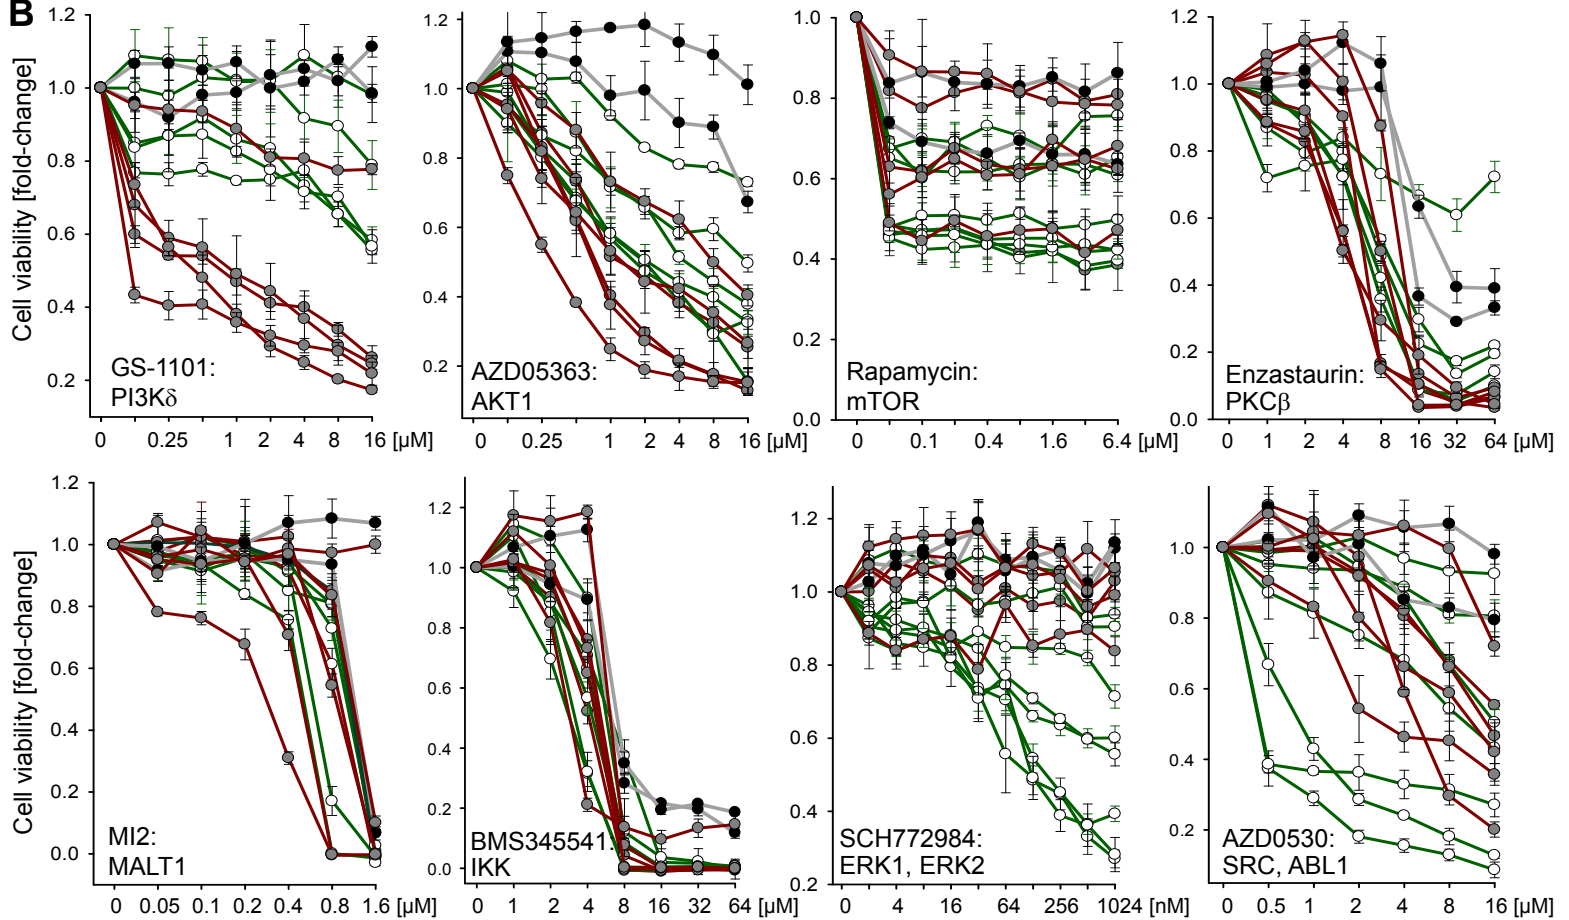

- Pre-BCR<sup>+</sup>: ICN12, 697, RCH-ACV, Kasumi-2, HPB-null, Nalm6
- Pre-BCR<sup>-</sup>: TOM1, BV173, PDX2, BLQ5, LAX2, SEM, BEL1, REH
- Burkitt's lymphoma: MN60, MHH-preB

**Figure S6. Related to Figure 7. Validation of BCL6-pre-BCR signaling as therapeutic target in pre-BCR<sup>+</sup> ALL.** (A) *BCL6* mRNA expression was measured by qTR-PCR in presence or absence of SYK inhibitor PRT062607 (10  $\mu$ M 24 hr), BTK inhibitor PCI-32765 (10  $\mu$ M 24 hr), or Dasatinib (25 nM 24 hr) in *TCF3-PBX1* ALL cells. Y axis shows the *BCL6* mRNA expression normalized to *COX6B*. Data represent means  $\pm$  SEM (n=3). P values from t-test. (B) pre-BCR<sup>+</sup> ALL cells (n=6, ICN12, 697, RCH-ACV, Kasumi-2, HPB-null and Nalm6), pre-BCR<sup>-</sup> ALL cells (n=8, TOM1, BV173, BLQ5, LAX2, PDX2, SEM, BEL1 and REH) and mature B cell lymphoma cells (n=2, MN60 and MHH-preB) were treated with inhibitors of pre-BCR downstream signaling GS-1101 (PI3K $\delta$ ), AZD05363 (AKT1), Rapamycin (mTOR), AZD0530 (SRC, ABL1), SCH772984 (ERK1, ERK2), Enzastaurin (PKC $\beta$ ), MI2 (MALT1), BMS345541 (IKK, NF-kB) at various concentrations and cell viability was measured by CCK-8 at different dose levels. Data represent means  $\pm$  SD (n=3).

# SUPPLEMENTAL EXPERIMENTAL PROCEDURES

## Primary Human Samples and Human Cell Lines

Primary ALL cases were obtained with the approval of the Institutional Review Boards of the University of California San Francisco (UCSF) and Oregon Health and Science University (OHSU). Primary human ALL samples were cultured on OP9 stroma in Minimum Essential Medium (MEM $\alpha$ , Life Technologies) with GlutaMAX containing 20% FBS, 100 IU ml<sup>-1</sup> penicillin, 100  $\mu$ g ml<sup>-1</sup> streptomycin and 1mM sodium pyruvate at 37°C in a humidified incubator with 5% CO<sub>2</sub>. The human cell lines were purchased from DSMZ (Braunschweig, Germany). See Table S1-S3.

## Extraction of Bone Marrow Cells from Mice

Bone marrow cells were extracted from 4-6 week old *Bcl6*<sup>fl/fl</sup> mice. Bone marrow cells were obtained by flushing cavities of femur and tibia with PBS. After filtration through a 40  $\mu$ m filter and depletion of erythrocytes using a lysis buffer (BD PharmLyse, BD Biosciences), washed cells were either frozen for storage or subjected to further experiments. All mouse experiments were subject to institutional approval by the University of California San Francisco Institutional Animal Care and Use Committee. The tables below showed mouse models used in this study and *Bcl6*<sup>fl/fl</sup> genotyping primers.

### Overview of genetic mouse models

| Mouse strain                                                | Source                                                                            | Purpose                                                                  |
|-------------------------------------------------------------|-----------------------------------------------------------------------------------|--------------------------------------------------------------------------|
| <sup>a</sup> <i>Stat5</i> <sup>fl/fl</sup>                  | Lothar Hennighausen, NIDDK                                                        | Cre mediated deletion of <i>Stat5a/b</i>                                 |
| <sup>b</sup> <i>Blnk</i> <sup>-/-</sup>                     | Hassan Jumaa, Max-Planck-Institute Freiburg                                       | Reconstitution of Blnk expression                                        |
| <i>Ighm</i> <sup>-/-</sup>                                  | Jackson Laboratories                                                              | Reconstitution of $\mu$ -chain expression                                |
| <sup>c</sup> <i>Rag2</i> <sup>-/-</sup> tTA/ $\mu$ -tg      | Hans-Martin Jäck, Universität Erlangen                                            | Inducible activation of pre-B cell receptor signaling                    |
| <i>Bcl6</i> <sup>fl/fl</sup>                                | Markus Muschen (UCSF), Ari Melnick (Weill Cornell), Hilde B. Ye (Albert Einstein) | Cre mediated deletion of <i>Bcl6</i>                                     |
| <sup>d</sup> <i>BCR-ABL1</i> -tg                            | Nora Heisterkamp, CHLA                                                            | <i>BCR-ABL1</i> transgenic mouse model for Ph <sup>+</sup> pre-B ALL     |
| <sup>e</sup> <i>TCF3-PBX1</i> -tg                           | Janetta J. Bijl, Hôpital Maisonneuve-Rosemont, Montreal, Canada                   | <i>TCF3-PBX1</i> -tg mouse model for t(1;19)(q23; p13.3) pre-B ALL       |
| <sup>f</sup> <i>LSL-MLL-AF4</i>                             | Scott Armstrong, MSKCC                                                            | loxP-Stop-loxP <i>MLL-AF4</i> mouse model for t(4;11)(q21;q23) pre-B ALL |
| <sup>g</sup> <i>CD3<math>\epsilon</math></i> <sup>-/-</sup> | Janetta J. Bijl, Hôpital Maisonneuve-Rosemont, Montreal, Canada                   | CD3 $\epsilon$ mutant mouse                                              |
| NOD/SCID                                                    | Jackson Laboratories                                                              | Xenograft recipient mice                                                 |
| NOD/SCID/IL-2 $\gamma$ <sup>null</sup>                      | Jackson Laboratories                                                              | Xenograft recipient mice                                                 |

a, *Stat5*<sup>fl/fl</sup>: Liu et al., *Genes Dev.* 1997; 11:179–186.

b, *Blnk*<sup>-/-</sup>: Jumaa et al. *Immunity* 1999; 11: 547-54.

c, *Rag2*<sup>-/-</sup> tTA/ $\mu$ -chain-tg: Hess et al. *PNAS* 2001; 98(4):1745-50.

d, *BCR-ABL1*-tg: Heisterkamp et al. *Nature* 1990; 344:251-3.

e, *TCF3-PBX1*-tg: Bijl et al. *Genes Dev.* 2005;19(2):224-33..

f, *MLL-AF4*-tg: Krivtsov et al. *Cancer Cell.* 2008;14(5):355-68.

g, Malissen, et al. *EMBO J* 1995; 14: 4641–4653.

## Genotyping PCR primers for *BCL6<sup>fl/fl</sup>* mouse cells

*Cre-mediated Bcl6 deletion*, product size for *Bcl6* WT: 417 bp; Flox allele: 533 bp; Cre deleted allele: 345 bp

|            |                                |
|------------|--------------------------------|
| Bcl6-Cre_F | 5'-CCTTGAAGGAGTTTTGCATGTGGG-3' |
| Bcl6-Cre_R | 5'-GGTTTAAGTGCAGGGGCCATTTC-3'  |
| Bcl6_R     | 5'-CCTTGAAGCGCATGAACTCCTTG-3'  |

*Bcl6* targeted mutation, product size for *Bcl6* WT: 193 bp; Flox allele: 1.4 kbp

|        |                                   |
|--------|-----------------------------------|
| Bcl6_F | 5'-CACAAACGTCATAGTCTCTCCAACCTC-3' |
| Bcl6_R | 5'-CTGAATGCGTGGATGCCGAGAG-3'      |

## Single-cell PCR and Sequence Analysis of V<sub>H</sub>-DJ<sub>H</sub> Gene Rearrangements

Normal human pro-B cells (CD19<sup>+</sup>CD34<sup>+</sup>VpreB<sup>-</sup>), pre-B cells (CD19<sup>+</sup>CD34<sup>-</sup>VpreB<sup>+</sup>) and immature B cells (CD19<sup>+</sup>CD10<sup>+</sup>CD20<sup>+</sup>) were sorted from human bone marrow from four healthy donors (Cambrex, Verviers, Belgium) by flow cytometry using antibodies (BD Biosciences) and a FACSVantage SE cell sorter (BD Biosciences). Single cells from each population were sorted into individual PCR reaction tubes (containing 20 µL 1X PCR buffer) for single-cell PCR analysis of Ig V<sub>H</sub>-DJ<sub>H</sub> gene rearrangements, as previously described (Trageser et al., 2009). In addition, 148 primary ALL samples were analyzed with Ig V<sub>H</sub>-DJ<sub>H</sub> gene rearrangements, including 7 *MLL-AF4*, 57 *BCR-ABL1*, 13 *ETV6-RUNX1*, 30 Hyperdiploid, 33 not otherwise specified, and 8 *TCF3-PBX1* ALL. The primary ALL samples or the cDNA of primary ALL samples were provided from the Departments of Hematology and Oncology, University Hospital Benjamin Franklin, Berlin, Germany (W.K. Hoffman), the University of Bologna, Bologna, Italy (G. Martinelli), and the Department of Medical Biosciences, Umea University, Umea, Sweden (A. Li) and the USC Norris Comprehensive Cancer Center in compliance with Institutional Review Board regulations (approval from the Ethik-Kommission of the Charité, Campus Benjamin Franklin and the Internal Review Board of the University of Southern California Health Sciences Campus). PCR primer sets are listed below.

### Single cell PCR for IGHM gene arrangement for human cells

|                          |                                  |
|--------------------------|----------------------------------|
| V <sub>H</sub> 1         | 5'-CAGTCTGGGGCTGAGGTGAAGA-3'     |
| V <sub>H</sub> 2         | 5'-GTCCTRCGCTGGTCAAACCCACACA-3'  |
| V <sub>H</sub> 3         | 5'-GGGGTCCCTGAGACTCTCCTGTGCAG-3' |
| V <sub>H</sub> 4         | 5'-GACCCTGTCCCTCACCTGCRCTGTC-3'  |
| V <sub>H</sub> 5         | 5'-AAAAAGCCCGGGGAGTCTCTGARGA-3'  |
| V <sub>H</sub> 6         | 5'-ACCTGTGCCATCTCCGGGGACAGTG-3'  |
| 3'J <sub>H</sub> 1.2.4.5 | 5'-ACCTGAGGAGACGGTGACCAGGGT-3'   |
| 3'J <sub>H</sub> 3       | 5'-ACCTGAAGAGACGGTGACCATTGT-3'   |
| 3'J <sub>H</sub> 6       | 5'-ACCTGAGGAGACGGTGACCGTGGT-3'   |
| 5'-J <sub>H</sub> 1.4.5  | 5'-GACGGTGACCAGGGTKCCCTGGCC-3'   |
| 5'-J <sub>H</sub> 2      | 5'-GACAGTGACCAGGGTGCCACGGCC-3'   |
| 5'-J <sub>H</sub> 3      | 5'-GACGGTGACCATTGTCCCTTGGCC-3'   |
| 5'-J <sub>H</sub> 6      | 5'-GACGGTGACCGTGGTCCCTTKGCC-3'   |



## Measurement of Ca<sup>2+</sup> Release in Response to pre-BCR Engagement

Human B- ALL cell lines or patient samples were treated with antibodies specific for the  $\mu$  chain of human (antibody purchased from Jackson ImmunoResearch Laboratories; Cat. No: 109-006-129, AffiniPure F(ab')<sub>2</sub> Fragment Goat Anti-Human IgM, Fc(5 $\mu$ ) Fragment Specific). Ca<sup>2+</sup> release from cytoplasmic stores in response to preB cell receptor engagement was measured by loading of the cells with the lipophilic Fluo-4 dye (Invitrogen, Carlsbad, CA).

## Flow Cytometry

Human and mouse samples were stained with FACS antibodies listed in the tables below according to manufacturer's instructions using FC Block as well as respective isotype controls. For apoptosis analyses, Annexin V, propidium iodide and 7-AAD were used (BD Biosciences).

### *Flow cytometry antibodies for human cells*

| Antigen                  | Clone ID        | Manufacturer   |
|--------------------------|-----------------|----------------|
| CD19                     | HIB19 (human)   | BD Biosciences |
| VpreB                    | HSL96 (human)   | BD Biosciences |
| IgLL1 ( $\lambda$ 5)     | HSL11 (human)   | BD Biosciences |
| $\mu$ HC (intracellular) | G20-127 (human) | BD Biosciences |

### *Flow cytometry antibodies for mouse cells*

| Antigen                  | Clone ID        | Manufacturer   |
|--------------------------|-----------------|----------------|
| CD19                     | 1D3 (mouse)     | BD Biosciences |
| CD25                     | 7D4 (mouse)     | BD Biosciences |
| CD8                      | 53-6.7 (mouse)  | BD Biosciences |
| CD43                     | S7 (mouse)      | BD Biosciences |
| CD79B                    | HM79-12 (mouse) | BD Biosciences |
| IgM                      | R6-60.2 (mouse) | BD Biosciences |
| $\mu$ HC (intracellular) | II/41 (mouse)   | BD Biosciences |
| Bcl6 (intracellular)     | K112-91 (mouse) | BD Biosciences |
| Blimp1 (intracellular)   | 5E7 (mouse)     | BD Biosciences |

## Western Blotting

Cells were lysed in CellLytic buffer (Sigma) supplemented with 1% protease inhibitor cocktail (Pierce), 1% Phosphatase inhibitor cocktail (Calbiochem Millipore) and 1mM PMSF. Protein samples were loaded on NuPAGE (Invitrogen) 4-12% Bis-Tris gradient gels and transferred on Nitrocellulose membranes (Invitrogen). For the detection of mouse and human proteins by Western blot, primary antibodies were used together with the WesternBreeze immunodetection system (Invitrogen). The antibodies used for Western blotting are listed in the table below.

## Western blot antibodies

| Antigen                           | Clone ID                                      | Manufacturer        |
|-----------------------------------|-----------------------------------------------|---------------------|
| BCL6                              | sc-7388                                       | Santa Cruz Biotech. |
| STAT5                             | 4459 (Figure 4D, left panel), 9363 (the rest) | Cell Signaling      |
| P-STAT5 <sup>Y694</sup>           | 9351                                          | Cell Signaling      |
| BLK                               | 3262                                          | Cell Signaling      |
| P-BLK <sup>Y388</sup>             | ab151726                                      | Abcam               |
| BTK                               | 3532                                          | Cell Signaling      |
| P-BTK <sup>Y223</sup>             | 5082                                          | Cell Signaling      |
| SYK                               | 13198                                         | Cell Signaling      |
| P-SYK <sup>Y352</sup>             | 2717                                          | Cell Signaling      |
| LYN                               | 2796                                          | Cell Signaling      |
| P-SRC <sup>Y416</sup>             | 6943                                          | Cell Signaling      |
| PLC $\gamma$ 2                    | 3872                                          | Cell Signaling      |
| P-PLC $\gamma$ 2 <sup>Y1217</sup> | 3871                                          | Cell Signaling      |
| ACTB                              | ab8227                                        | Abcam               |

## Colony-Forming Assay

10,000 *TCF3-PBX1* ALL cells were treated either with 5  $\mu$ M retro-inverso BCL6 peptide-inhibitor (RI-BPI) or vehicle control for 2 hr and then plated in semisolid agar (containing 5  $\mu$ M RI-BPI) for the methylcellulose colony-forming assays. Colonies were counted about 10 days after plating.

## Cell-Cycle Analysis

The BrdU flow cytometry kit for cell-cycle analysis (BD Biosciences) was used according to manufacturer's instructions. BrdU incorporation (APC-labelled anti-BrdU antibodies) was measured with DNA content (7-ADD) in fixed and permeabilized cells. The analysis was gated on viable cells that were identified based on scatter morphology.

## Cell Proliferation and Viability Assay

One hundred thousand human leukemia cells using cell lines or primary samples were seeded in a volume of 100  $\mu$ L B cell medium (as described in "Primary human samples and human cell lines") per well on Optilux 96-well plate (BD Biosciences, San Jose, CA). SYK inhibitor (PRT062607), BTK inhibitor (PCI-32765 or Ibrutinib), or Dasatinib were diluted in medium and added at the indicated concentration in a total culture volume of 150  $\mu$ L. After culturing for 72 hr, cell proliferation and viability was measured by Cell Counting Kit 8 (CCK-8; Dojindo Inc. Rockville, MD) according to the manufacturer's instructions. The fluorescence was read at 450 nm. Fold changes were calculated using baseline values of untreated cells as a reference (set to 100%).

## Retroviral and Lentiviral Transduction

Transfections of the MSCV-based retroviral constructs were performed using Lipofectamine 2000 (Invitrogen, Carlsbad, CA) with Opti-MEM media (Invitrogen). Retroviral supernatant was produced by co-transfecting 293FT cells with the plasmids pHIT60 (gag-pol) and pHIT123 (ecotropic env; kindly provided by Donald B Kohn, UCLA). Cultivation was performed in high glucose Dulbecco's modified Eagle's medium (DMEM, Invitrogen) with GlutaMAX containing 10% fetal bovine serum, 100 IU/mL penicillin, 100 µg/mL streptomycin, 25 mM HEPES, 1 mM sodium pyruvate and 0.1 mM non-essential amino acids. Regular media were replaced after 16 hr by growth media containing 10 mM sodium butyrate. After 8 hr incubation, the media was changed back to regular growth media. 24 hr later, the virus supernatant were harvested, filtered through a 0.45 µm filter and loaded by centrifugation (2000 x g, 90 min at 32°C) two times on 50 µg/mL RetroNectin (Takara, Madison, WI) coated non-tissue 6-well plates. 1-2 x 10<sup>6</sup> pre-B cells were transduced per well by centrifugation at 600 x g for 30 min and maintained for 72 hr at 37°C with 5% CO<sub>2</sub> before transferring into culture flasks.

Human BCL6 shRNA were ordered from Invitrogen (Carlsbad, CA; BCL6 shRNA sequence: 5'-GCTGTTGACAGTGAGCGCACAGACCAGTTGAAATGCAACTAGTGAAGCCACAGATGTAGTTGCATT TCAACTGGTCTGTATGCCTACTGCCTCGGA-3') and cloned into a "pCL6-TRRIP" lentiviral vector (Open Biosystems, Pittsburgh, PA) as described in (Park et al., 2011). Human *TCF3-PBX1* ALL cells were transduced with pCL6-TRRIP-BCL6-shRNA. Puromycin selection of transduced cells (sorting by FACS) was done before doxycycline induction (0.5 µg/mL) 72 hr before quantification of BCL6 knock-down.

### Retroviral vector systems used

| Construct                              | Overexpression of         | Purpose                                          |
|----------------------------------------|---------------------------|--------------------------------------------------|
| Constitutive expression                |                           |                                                  |
| MSCV IRES-GFP                          | GFP                       | Empty vector control                             |
| MSCV IRES-CD8                          | CD8                       | Empty vector control                             |
| MSCV IRES-Neo                          | Neomycin resistance       | Empty vector control                             |
| MSCV Cre-IRES-GFP                      | Cre; GFP                  | Activation of Cre                                |
| MSCV BCR-ABL1-Neo                      | BCR-ABL1                  | Leukemic transformation ( <i>BCR-ABL1</i> ALL)   |
| MSCV TCF3-PBX1-Neo                     | TCF3-PBX1                 | Leukemic transformation ( <i>TCF3-PBX1</i> ALL)  |
| MSCV MLL-ENL-Neo                       | MLL-ENL                   | Leukemic transformation ( <i>MLL-ENL</i> ALL)    |
| MSCV BLNK-IRES-GFP                     | BLNK                      | Reconstitution of BLNK                           |
| MSCV IGHµ-IRES-CD8                     | IGHM (µ-chain)            | Reconstitution of µ-chain                        |
| MSCV BCL6-IRES-GFP                     | BCL6                      | Reconstitution of BCL6                           |
| pCL6-LUC-Blast                         | Luciferase                | Detection of human leukemic cells <i>in vivo</i> |
| Inducible expression                   |                           |                                                  |
| MSCV - ER <sup>T2</sup> -IRES-Puro     | Puromycin resistance      | Empty vector control                             |
| MSCV - ER <sup>T2</sup> -IRES-GFP      | GFP                       | Empty vector control                             |
| MSCV - Cre-ER <sup>T2</sup> -IRES-Puro | Cre; Puromycin resistance | Inducible activation of Cre                      |
| MSCV - Cre-ER <sup>T2</sup> -IRES-GFP  | Cre; GFP                  | Inducible activation of Cre                      |

## Quantitative Real-time PCR (qRT-PCR)

Total RNA from cells was extracted using RNeasy isolation kit from Qiagen (Valencia, CA) or NucleoSPIN RNA from Macherey-Nagel (Bethlehem, PA). cDNA was generated using a poly(dT) oligonucleotide and the SuperScript III Reverse Transcriptase (Invitrogen, Carlsbad, CA). Quantitative real-time PCR was performed with FAST SYBR<sup>®</sup> Green Master Mix (Applied Biosystems, Foster City, CA) and the Vii7 real-time PCR system (Applied Biosystems, Foster City, CA) according to standard PCR conditions. Primers for quantitative RT-PCR are listed in the table below.

### Quantitative RT-PCR primers for human cells

|         |                            |
|---------|----------------------------|
| BCL6_F  | 5'-TGAGAAGCCCTATCCCTGTG-3' |
| BCL6_R  | 5'-TGTGACGGAAATGCAGGTTA-3' |
| PRDM1_F | 5'-GAATACGGTGTCCCCTGTGG-3' |
| PRDM1_R | 5'-GGGTAGGAGCCCAAACCTTC-3' |
| GAPDH_F | 5'-TTAGCACCCCTGGCCAAGG-3'  |
| GAPDH_R | 5'-CTTACTCCTTGGAGGCCATG-3' |
| COX6b_F | 5'-AACTACAAGACCGCCCCTTT-3' |
| COX6b_R | 5'-GCAGCCAGTTCAGATCTTCC-3' |

---

## Immunohistochemistry

The BCL6 immunohistochemistry was performed at UCSF Immunohistochemistry and Molecular Pathology Core Facility as described in (Deucher A et al., 2015). The cytoplasmic  $\mu$ HC immunohistochemistry was performed at USC clinical laboratory. Routinely processed paraffin-embedded tissue sections were used for the immunohistochemical studies. The sections were cut at 4  $\mu$ m and mounted onto slides. For the BCL6 studies, a Burkitt lymphoma bone marrow sample acted as a positive control and a chronic myeloid leukemia sample acted as a negative control. Immunohistochemical analysis was performed using a prediluted BCL6 antibody (mouse, monoclonal, clone GI191E/A8, Cell Marque, Rocklin, CA). Briefly, a DAKO Target Retrieval Solution (DAKO, Carpinteria, CA) at pH 6.0 was applied to the slides; they were then put into the pressure cooker. Following washing, blocking was performed using 3% H<sub>2</sub>O<sub>2</sub>, and the slides were then loaded onto an Immunostainer (Life Technologies, Carlsbad, CA). The secondary antibody was the EnVision+ system (DAKO, Carpinteria, CA). The slides were counterstained using hematoxylin and blue and then dehydrated in graded ethanols and covered with a coverslip. Expression of BCL6 in B-cell lymphoblastic leukemia cells was evaluated independently by a pathologist with the sample information blinded. BCL6 positive was called based on at least 50% of the cells are stained positive, weak positive when >20% of the cells are positively stained, and negative when <20% of the cells are stained BCL6 positive. The

double staining of BCL6 (nuclear, brown; Clone ID: PG-B6p; DAKO, Carpinteria, CA USA) and  $\mu$ HC (cytoplasmic/membrane, red; Clone ID: 8H6; Novocastra, Leica Biosystems, Buffalo Grove, IL USA) was performed at USC clinical laboratory.

### **Fluorescence in Situ Hybridization (FISH)**

FISH was performed using Abbott LSI TCF3-PBX1 Dual Color Dual Fusion Translocation Probe (Abbott Molecular, Abbott Park, IL) following the manufacturer's protocol. The cells were counterstained with DAPI I (Abbott Molecular, Abbott Park, IL). FISH results were analyzed and documented using CytoVision System (Leica Microsystems, Buffalo Grove, IL).

### **Tyrosine Kinase Inhibitors and BCL6 Inhibitors**

The tyrosine kinase inhibitors were purchased from the following catalog numbers and companies: PRT062607 (SYK): S8032, SelleckChem; Ibrutinib (BTK): S2680, SelleckChem; Dasatinib (SRC): D-3307, LC Labs; GS-1101 (PI3K $\delta$ ): CT-CAL101, ChemieTek; AZD05363 (AKT1): CT-A5363, ChemieTek; Rapamycin (mTOR): S1039, SelleckChem; AZD0530 (SRC/ABL1): S1006, SelleckChem; SCH772984 (ERK1, ERK2): S7101, SelleckChem; Enzastaurin (PKC $\beta$ ): S1055, SelleckChem; MI2 (MALT1): 500491, EMD Millipore; BMS345541 (IKK, NF- $\kappa$ B): HY-10518, MedChem Express. Integrating experimentally measured sensitivities to individual inhibitors with their known inhibitory profile based on biochemical IC<sub>50</sub> values for individual kinase targets, a kinase dendrogram of specific vulnerabilities of pre-BCR<sup>+</sup> and pre-BCR<sup>-</sup> ALL was plotted using TREESpots software (KINOMEscan®, <http://www.discoverx.com/services/drug-discovery-development-services/treespot-data-analysis>). The peptidomimetic BCL6 inhibitor RI-BPI (Cerchietti et al., 2009) was synthesized by Biosynthesis, Inc. (Lewisville, TX; amino acids sequence: GRRRQRRKKRGGRGIEHISRGGDIMGEWGNEIFGAIAGFLG; purity >95% by high-performance liquid chromatography-mass spectrometry). RI-BPI was stored at -20°C until reconstituted with sterile, distilled, degassed water immediately before use.

### ***In Vitro* Drug Sensitivity**

*In vitro* drug sensitivity assays were performed as previously described (Tyner et al., 2013). Briefly, mononuclear cells were separated by Ficoll gradient, and then underwent erythrocyte lysis with Ammonium-Chloride-Potassium (ACK) lysing buffer from Invitrogen (Grand Island, NY). Cells were then incubated in increasing concentrations of drug for three days at 37°C, 5% CO<sub>2</sub> in R20 [RPMI-1640 medium supplemented with 20% FBS, L-glutamine, penicillin/streptomycin, and fungizone supplemented with 10<sup>-4</sup> M 2-mercaptoethanol], then subjected to MTS as a marker for relative cell viability. IC<sub>50</sub> values were calculated using second-degree polynomial regression curves fit through 5 data points (average of

no drug wells and 4 serial dilution points), as previously described in (Tyner et al., 2013). Where an IC<sub>50</sub> was not achieved for a given drug, an IC<sub>50</sub> value equal to the highest drug concentration used was arbitrarily assigned. All curves were manually inspected. For a given sample, its sensitivity to a drug was defined as the percentage of the drug IC<sub>50</sub> value in this sample to the median IC<sub>50</sub> value which was computed from over 400 primary leukemia samples interrogated by this assay at Oregon Health & Science University (Portland, OR; Tyner et al., 2013).

### ***In Vivo* Leukemia Cell Transplantation and Treatment (07-112, 11-064, 09-565)**

All animal studies were conducted with approval from OHSU's Institutional Animal Care and Use Committee. Veterinary care was provided through the OHSU Department of Comparative Medicine. NOD/SCID/IL-2 $\gamma$ <sup>null</sup> (NSG) mice were sub-lethally irradiated with 200 centigray at age 6 wk, anesthetized with isoflurane and injected 24 hr later via tail vein with 0.5-3 million cells from frozen patient samples. Mice were then placed on ciprofloxacin (0.25 mg/ml) containing water for 4 wk during recovery. They were then maintained on acidified water of 1mM HCl. Peripheral blood was monitored weekly starting on week 3 by flow cytometry for human engraftment using antibodies against human CD19 and CD45 (hCD19-APC, hCD45-FITC) versus murine CD45 (mCD45-PerCP-Cy5.5). Flow cytometric data was analyzed using FACS/AriaIII. When the mice were determined to be engrafted with >10% human chimerism in peripheral blood, the animals were euthanized and secondary xenografts were established from leukemic cells harvested from the spleen and used for treatment. Cohorts of NSG mice were again injected as described above. One week after tail vein injection of leukemic cells, the mice were divided into two groups and treated by oral gavage with dasatinib at 50 mg/kg/dose daily or citrate control for 5 days/week as previously described (Bicocca et al., 2012; Kolb et al., 2008). Treatment continued until the day of sacrifice (4-20 wk). Peripheral blood was again monitored weekly starting on week 3 by flow cytometry for human engraftment. When the mice were determined to be engrafted, or became too ill according to standard parameters set by the Institutional Animal Care and Use Committee protocol, they were euthanized via general anesthesia and cervical dislocation. Bone marrow and spleen were harvested at the time sacrifice.

### ***In Vivo* Leukemia Cell Transplantation and Treatment (ICN12)**

All mouse experiments were subject to institutional approval by the University of California San Francisco Institutional Animal Care and Use Committee. 1 x 10<sup>6</sup> cells from a bone marrow biopsy of a patient with *TCF3-PBX1* pre-BCR<sup>+</sup> ALL (ICN12) were inoculated via intravenous (I.V.) injection into sublethally irradiated (250 cGy) adult female NOD/SCID mice (n=28). After injection of leukemia cells the mice were randomly separated into four groups. The first group was treated by oral gavage with

Dasatinib (40 mg/kg); the second group was treated by oral gavage with Ibrutinib (75 mg/kg); the third group was treated with PRT062607 (100 mg/kg); the fourth group was treated with vehicle and used as controls. Mouse survival was monitored. When the mice became terminally ill because of overt leukemia, they were sacrificed and leukemia cells were harvested from bone marrow and spleen. Leukemic infiltration was confirmed by flow cytometry. Pictures were taken using a digital camera (Olympus DP72) attached to a light microscope (Axioskop, Carl Zeiss) with 34 and 320 Plan Neofluar objectives (Carl Zeiss).

### Chromatin Immunoprecipitation (ChIP) and QChIP

697 cells were fixed with 1% formaldehyde, lysed and sonicated to generate fragments less than 500 bp. ICN12 cells were treated similarly except they were initially fixed first with 2 mM Di (N-succinimidyl) glutarate before 1% formaldehyde fixation. Antibodies used are listed in the table below. Sonicated lysates were incubated with antibodies overnight and after increasing stringency washes immunocomplexes were recovered and DNA was isolated. The ChIP protocol was performed as in Geng et al. (Geng et al., 2012). A fraction (0.2 ng) of the input and the ChIPed DNA were used as templates in QPCR reactions using SYBR Green<sup>TM</sup> and a 7300 ABI qRT-QPCR machine (Applied Biosystems, CA). The QChIP results were quantified and shown as fold enrichment relative to inputs. A stable 697 line with inducible expression of TCF3-PBX1-hf (HA-FLAG tag) was established by co-infection with a human EF1a promoter-driven regulatory rtTA3 and a tetracycline response element promoter-driven TCF3-PBX1-hf expressing lentiviral constructs (kind gifts of Dr. Robert Roeder, Rockefeller University). Positive clones were isolated by standard serial dilution method with puromycin selection (Puromycin resistance gene is encoded by rtTA3 lentiviral construct). The QChIP antibodies and primer sequences are provided in the table below.

#### *Antibodies used for ChIP-seq and QChIP for human cells*

| Antibody              | Clone ID | Manufacturer   |
|-----------------------|----------|----------------|
| TCF3 <sup>N</sup>     | 12258    | Cell Signaling |
| PBX1/2/3 <sup>C</sup> | sc-888   | Santa Cruz     |
| p300                  | sc-585   | Santa Cruz     |
| Anti-HA-tag           | ab9110   | Abcam          |
| BCL6                  | 4242     | Cell Signaling |
| IgG                   | 2729     | Cell Signaling |

#### *Quantitative ChIP primers for TCF3-PBX1 fusion protein binding in 697 cells*

| Target promoter | Forward primer (5' → 3') | Reverse primer (5' → 3') |
|-----------------|--------------------------|--------------------------|
| IGLL1 (λ5)      | CACAGCAGGGCAGTTGGCAGATG  | CGCTGGCAGCAGCTGTCCCATTG  |
| VpreB1          | ACCCAAAGGCCTCCAGGGCA     | ACCGGAACAGTGTCGGGGCA     |
| VpreB3          | CACAGACTCCAAGGGGTAGG     | TGGTAGCCTGACCTTCCTGT     |

|             |                          |                          |
|-------------|--------------------------|--------------------------|
| CD79A (Iga) | CAGGGAAGGGACAAGGTTTG     | ACCTGTGGTGGCCACAATTC     |
| CD79B (Igb) | CGAGGCTCCTTGGAGGAAAA     | GGTCCCAATTTGCATGGCAG     |
| IgH Eμ      | TCACTTCTGGTTGTGAAGAGGTGG | GTTTCGGTCAGCCTCGCCTTATTT |
| BCL6        | GGAATCCTTACGGCTTGGCAG    | GGGCTGAGGGTCTCCATCATAGG  |
| NCAPD2      | ATGGTTGCCACTGGGGATCT     | TGCCAAAGCCTAGGGGAAGA     |

*Quantitative ChIP primers for TCF3-PBX1 fusion protein binding in ICN12 and RCH-ACV cells*

| Target promoter | Forward primer (5' → 3') | Reverse primer (5' → 3') |
|-----------------|--------------------------|--------------------------|
| IgLL1 (λ5)      | GTCAGGATCCAGGGCTCAAC     | GTGGGAGGTCCCCAAACAAA     |
| VpreB1          | CCCATGCCTGAGTCACTCTAC    | GAGCGGGTTGGGATGTTCT      |
| VpreB3          | GCCACCCTAGAGCCATAACC     | ACTGGTAGCCTGACCTTCCT     |
| CD79A (Iga)     | GGGACTGCTGCAACTCAAAC     | TGGCCACATACCCAGGTAGA     |
| CD79B (Igb)     | GCCCTAGGGACCATTGTTTG     | TCAGACTTTCCAGCCTCAT      |
| IgH Eμ          | ACCACCTCTTCAACAACAGA     | GGTCACCGCGAGAGTCTA       |
| BCL6            | CGTAGCAGTGGTAAAGTCCGAAGC | GCAGCAACAGCAATAATCACCTGG |
| Control         | GGCTCCTGTAACCAACCACTACC  | CCTCTGGGCTGGCTTCATTC     |

*Quantitative ChIP primers for BCL6 binding in ICN12 cells*

| Target promoter | Forward primer (5' → 3') | Reverse primer (5' → 3') |
|-----------------|--------------------------|--------------------------|
| BCL6            | CGTAGCAGTGGTAAAGTCCGAAGC | GCAGCAACAGCAATAATCACCTGG |
| CDKN1B          | GGTGATACCACAGGCTCAAGA    | GTTGCCTGCAGATGTTTCCT     |
| CDKN2C          | GAACAAGGGTGGGTGAATGC     | CCGCGGAAGGAAAGACATTC     |
| EBF3            | AGGCTCTTAGGGCTTGCATT     | GCTCTCCACCAGGCAAGTT      |
| IKZF2           | CAGGCAGATGAGGGCTCAATA    | TCCTTGACAGCATGCATGAC     |
| IRF4            | CCATCGCAGTGGAACTCAG      | AGGGGAGAACAATCGTAACAAC   |
| PRDM1           | CAGTCCGAGGAAGGCTAACT     | GGGTTCCATCGCTCTTGTACT    |
| RB1             | TTGCGGCGTTTCCTTAGAAC     | AAGCCGACTAACACGCAAGA     |
| COX6b           | CTGTCCGACTGTGGTGTCTT     | TCAACCTGCAGCTCAATGTG     |
| Control         | GGCTCCTGTAACCAACCACTACC  | CCTCTGGGCTGGCTTCATTC     |

**Genomic DNA-Fragment Library for ChIP Sequencing (ChIP-seq)**

Genomic DNA-fragment libraries were prepared using the Illumina ChIP-seq Library preparation Kit following the manufacturer's instructions (Illumina, CA). Briefly 10ng of purified ChIP DNA was end repaired by conversion of overhangs into phosphorylated blunt ends with the use of T4 DNA polymerase and E. coli DNA polymerase I Klenow fragment. Illumina paired-end adapters were ligated to the ends of the DNA fragments. Ligation products were purified on a 2% agarose gel with a size selection of 200-300 bp. Fifteen PCR cycles were performed with Illumina genomic DNA primers that anneal to the ends of the adapters. The purified PCR-amplified fragment libraries were quantified with the use of the PicoGreen dsDNA Quantitation Assay with the Qubit Fluorometer (Invitrogen, CA). The size range of



libraries was validated on the Agilent Technologies 2100 Bioanalyzer with the High Sensitivity DNA Kit (Agilent, CA). After library preparation, the protocols for the Illumina Single-Read Cluster Generation Kit were used for cluster generation on the cBOT (Illumina). The targeted samples were diluted to 10 nmol and denatured with sodium hydroxide. Seven pico moles of each target-enriched sample and Phix control were loaded into separate lanes of the same flow cell, hybridized, and isothermally amplified. After linearization, blocking, and primer hybridization, sequencing was performed for 50 cycles on an Illumina HiSeq2000. Raw image data were converted into base calls via the Illumina pipeline CASAVA version 1.8 with default parameters. Rigorous quality control was performed with the use of data from reports generated by the Illumina pipeline.

### **ChIP-seq Data Analysis**

All 50 bp-long reads were mapped to the reference human genome sequence, hg18, using BWA (Li and Durbin, 2009) aligner with the default parameters. Only reads mapping uniquely to the genome with not more than 2 mismatches were retained for further analysis. Clonal reads (i.e., reads mapping at the same genomic position and on the same strand) were collapsed into a single read. Peaks from ChIP-seq data were called using the ChIPseeqer program (Giannopoulou and Elemento, 2011) and annotated to gene promoters (+/- 2kb to TSS (transcription start site)) based on hg18 refseq genes downloaded from the UCSC Genome Browser. To estimate self-consistency and determine appropriate thresholds for binding sites peak calling, Irreproducibility Discovery Rate (IDR) analysis (Landt et al., 2012; Li et al., 2011) were performed for each of the mapped samples. Each mapped sample was randomly split into 2 pseudo-replicates with approximately equal number of reads. Peaks were then called from the two pseudo-replicates using ChIPseeqer-2.0 (Giannopoulou and Elemento, 2011). The output peak files were converted to the ENCODE narrowPeak format. Based on the ranking of peak p-values, IDR was calculated on the pseudo-replicates using the R scripts from <https://sites.google.com/site/anshulkundaje/projects/idr>.

### **Reverse Phase Protein Array (RPPA) Analysis**

Proteomic profiling was performed using RPPA as described (Tibes et al., 2006). Briefly, samples were printed in 5 serial dilutions along with normalization and expression controls, with fractions from each patient clustered together. All samples were printed in replicate. Pearson correlation coefficients of duplicated samples within arrays had mean, median, and standard deviations of 0.84, 0.87, 0.09, respectively. Slides were probed with 133 validated primary antibodies, detecting total, phospho or cleaved proteins, and a secondary antibody to amplify the signal, and a stable dye is precipitated. The antibodies used in this study are listed in the table below. For the statistical analysis, relative protein

concentrations in  $\log_2$  scale were estimated by fitting a common logistic response curve using all sample dilution series within an array. The algorithm was implemented in an R package, *SuperCurve*. A topographical normalization followed by a median polish procedure was used to account for within-array background staining and sample loading variations.

*Antibodies used for reverse phase protein arrays*

| <b>Antigen</b>  | <b>Clone ID</b> | <b>Manufacturer</b> |
|-----------------|-----------------|---------------------|
| LYN             | 2732            | Cell Signaling      |
| AKT1            | 4691            | Cell Signaling      |
| AKT-pS473       | 9271            | Cell Signaling      |
| AKT-pT308       | 2965            | Cell Signaling      |
| ERK2            | 9108            | Cell Signaling      |
| ERK-pT202/Y204  | 9101            | Cell Signaling      |
| GAB2            | 3239            | Cell Signaling      |
| GAB2-pY452      | 3882            | Cell Signaling      |
| MEK-pS217/S221  | 9154            | Cell Signaling      |
| MEK             | 9125            | Cell Signaling      |
| mTOR            | 2983            | Cell Signaling      |
| MTOR-pS2448     | 2971            | Cell Signaling      |
| P38a            | 9228            | Cell Signaling      |
| p38             | 9212            | Cell Signaling      |
| P38a-pT180/Y182 | 9211            | Cell Signaling      |
| RPS6KB-S371     | 9205            | Cell Signaling      |
| PDK1            | 3062            | Cell Signaling      |
| PDK1-pS241      | 3061            | Cell Signaling      |
| PIK3CD          | 4255            | Cell Signaling      |
| PIK3R1          | 06-195          | Millipore           |
| PKCa            | 05-154          | Millipore           |
| PKCa-pS657      | 06-822          | Millipore           |
| PKCd-pS645      | 9371            | Cell Signaling      |
| PKCd-pS664      | 07-875          | Millipore           |
| PTEN            | 9552            | Cell Signaling      |
| PTEN-pS380      | 3539            | Cell Signaling      |
| RPS6-pS235/6    | 2211            | Cell Signaling      |
| RPS6-pS240/244  | 2215            | Cell Signaling      |
| SRC             | 05-184          | Millipore           |
| SRC-pY416       | 2101            | Cell Signaling      |
| SRC-pY527       | 2105            | Cell Signaling      |
| STAT5           | 9352            | Cell Signaling      |
| STAT5-pY694     | 9351            | Cell Signaling      |

**Patient Gene Expression Microarray and Outcome Data**

Gene expression microarray data from three large cohorts of patients with pre-B ALL were downloaded from GSE5314 (Geng et al., 2012) (the Eastern Cooperative Oncology Group (ECOG) Clinical Trial E2993, n=191), GSE11877 (Harvey et al., 2010) (the Children’s Oncology Group (COG) Clinical Trial P9906, n=207), St. Jude Research Hospital pediatric ALL (Ross et al., 2003) (n=132 ALL,

<http://www.stjudereseearch.org/site/data/ALL3/>), and normal pre-B samples (van Zelm et al., 2005, Trageser et al., 2009) (n=14, <http://franklin.et.tudelft.nl/>). Patient outcome data were obtained from the National Cancer Institute TARGET Data Matrix ([http://target.nci.nih.gov/dataMatrix/TARGET\\_DataMatrix.html](http://target.nci.nih.gov/dataMatrix/TARGET_DataMatrix.html)) of the Children's Oncology Group (COG) Clinical Trial P9906 (Harvey et al., 2010; Hogan et al., 2011). The end point of the clinical data is overall survival (OS).

### **Pathway and Motif Analysis**

The Ingenuity Pathway Analysis (IPA) software (Ingenuity Systems, Inc. Redwood City, CA) was also used to identify deregulated gene networks. The motif analysis was done with Cistrome DNA motif-finding analysis (Liu et al., 2011).

### **Statistical Analysis**

The comparisons for the means between two groups were made by two-tailed t test or Wilcoxon's rank-sum test using R software (R Development Core Team 2009; <http://www.r-project.org>). The Kaplan-Meier method was used to estimate overall survival. Log-rank test was used to compare survival differences between patient groups. The R package 'survival' version 2.35-8 was used for the survival analysis. The level of significance was set at  $p < 0.05$ .

## **SUPPLEMENTAL REFERENCES**

Bicocca, V. T., Chang, B. H., Masouleh, B. K., Muschen, M., Loriaux, M. M., Druker, B. J., and Tyner, J. W. (2012). Crosstalk between ROR1 and the Pre-B cell receptor promotes survival of t(1;19) acute lymphoblastic leukemia. *Cancer Cell* 22, 656-667.

Bijl J, Sauvageau M, Thompson A, Sauvageau G. (2005). High incidence of proviral integrations in the Hoxa locus in a new model of E2a-PBX1-induced B-cell leukemia. *Genes Dev.* 19(2):224-33.

Deucher A, Yu J, Zhongxia Q, George T, and J., E. (2015). BCL6 expression correlates with the t (1;19) translocation (TCF3 (E2A)/PBX1) in B-cell lymphoblastic leukemia. *American Journal of Clinical Pathology*. In Press.

Giannopoulou, E. G., and Elemento, O. (2011). An integrated ChIP-seq analysis platform with customizable workflows. *BMC Bioinformatics* 12, 277.

Heisterkamp N, Jenster G, ten Hoeve J, Zovich D, Pattengale PK, Groffen J. (1990). Acute leukaemia in bcr/abl transgenic mice. *Nature* 344:251-3.

Hogan, L. E., Meyer, J. A., Yang, J., Wang, J., Wong, N., Yang, W., Condos, G., Hunger, S. P., Raetz, E., Saffery, R., et al. (2011). Integrated genomic analysis of relapsed childhood acute lymphoblastic leukemia reveals therapeutic strategies. *Blood* 118, 5218-5226.

Hess J, Werner A, Wirth T, Melchers F, Jäck HM, Winkler TH. (2001). Induction of pre-B cell proliferation after de novo synthesis of the pre-B cell receptor. *Proc Natl Acad Sci U S A* 98(4):1745-50.

- Jumaa H, Wollscheid B, Mitterer M, Wienands J, Reth M, Nielsen PJ. (1999). Abnormal development and function of B lymphocytes in mice deficient for the signaling adaptor protein SLP-65. *Immunity* 11: 547-54.
- Kolb, E. A., Gorlick, R., Houghton, P. J., Morton, C. L., Lock, R. B., Tajbakhsh, M., Reynolds, C. P., Maris, J. M., Keir, S. T., Billups, C. A., and Smith, M. A. (2008). Initial testing of dasatinib by the pediatric preclinical testing program. *Pediatr Blood Cancer* 50, 1198-1206.
- Krivtsov AV, Feng Z, Lemieux ME, Faber J, Vempati S, Sinha AU, Xia X, Jesneck J, Bracken AP, Silverman LB, Kutok JL, Kung AL, Armstrong SA. (2008). H3K79 methylation profiles define murine and human MLL-AF4 leukemias. *Cancer Cell* 14(5):355-68.
- Landt, S. G., Marinov, G. K., Kundaje, A., Kheradpour, P., Pauli, F., Batzoglou, S., Bernstein, B. E., Bickel, P., Brown, J. B., Cayting, P., et al. (2012). ChIP-seq guidelines and practices of the ENCODE and modENCODE consortia. *Genome Res* 22, 1813-1831.
- Li, H., and Durbin, R. (2009). Fast and accurate short read alignment with Burrows-Wheeler transform. *Bioinformatics* 25, 1754-1760.
- Li, Q., Brown, J. B., Huang, H., and Bickel, P. J. (2011). Measuring reproducibility of high-throughput experiments. *The Annals of Applied Statistics* 5, 1752–1779.
- Liu, T., Ortiz, J. A., Taing, L., Meyer, C. A., Lee, B., Zhang, Y., Shin, H., Wong, S. S., Ma, J., Lei, Y., et al. (2011). Cistrome: an integrative platform for transcriptional regulation studies. *Genome Biol* 12, R83.
- Liu X, Robinson GW, Wagner KU, Garrett L, Wynshaw-Boris A, Hennighausen L. (1997). Stat5a is mandatory for adult mammary gland development and lactogenesis. *Genes Dev.* 11:179–186.
- Malissen, M., Gillet, A., Ardouin, L., Bouvier, G., Trucy, J., Ferrier, P., Vivier, E., and Malissen, B. (1995). Altered T cell development in mice with a targeted mutation of the CD3- $\epsilon$  gene. *EMBO J* 14: 4641–4653.
- Park, E., Gang, E. J., Hsieh, Y. T., Schaefer, P., Chae, S., Klemm, L., Huantes, S., Loh, M., Conway, E. M., Kang, E. S., et al. (2011). Targeting survivin overcomes drug resistance in acute lymphoblastic leukemia. *Blood* 118, 2191-2199.
- van Zelm, M. C., van der Burg, M., de Ridder, D., Barendregt, B. H., de Haas, E. F., Reinders, M. J., Lankester, A. C., Revesz, T., Staal, F. J., and van Dongen, J. J. (2005). Ig gene rearrangement steps are initiated in early human precursor B cell subsets and correlate with specific transcription factor expression. *J Immunol* 175, 5912-5922.
